# Supplementary material for: A theoretical investigation of the hydrolysis of uranium hexafluoride: the initiation mechanism and vibrational spectroscopy
Source: Royal Society of Chemistry journal article supplement (doi:10.1039/d1cp05268c), 2022-01-01
Supplement: d1cp05268c1.pdf [file d1cp05268c1.pdf]

# Supporting Information for: “Theoretical investigation of uranium hexafluoride hydrolysis: Initiation mechanism and vibrational spectroscopy”

Jesse J. Lutz,<sup>a</sup> Jason N. Byrd,<sup>b</sup> Victor F. Lotrich,<sup>b</sup> Daniel S. Jensen,<sup>a</sup> Judit Zador,<sup>c</sup>  
and Joshua A. Hubbard<sup>a</sup>

## Contents

|            |                                                                                                                                         |           |
|------------|-----------------------------------------------------------------------------------------------------------------------------------------|-----------|
| <b>I</b>   | <b>Supplementary benchmark studies</b>                                                                                                  | <b>2</b>  |
| 1          | Benchmark analysis of the vibrational frequencies of UF <sub>6</sub> and UF <sub>6</sub> ⋯H <sub>2</sub> O                              | 2         |
| 2          | Estimation of the Hartree-Fock extrapolation error for the UF <sub>6</sub> +H <sub>2</sub> O barrier height                             | 2         |
| 3          | A comparison of initiation-step barrier heights produced by various methods                                                             | 3         |
| <b>II</b>  | <b>Computed PBE0-level molecular geometries, energies, and properties</b>                                                               | <b>5</b>  |
| 4          | Pre-reaction dimer and trimer formation                                                                                                 | 5         |
| 5          | Elementary step 1: UF <sub>6</sub> OH to UF <sub>5</sub> OH                                                                             | 6         |
| 6          | Elementary step 2: UF <sub>5</sub> OH to UOF <sub>4</sub>                                                                               | 12        |
| 7          | Elementary step 3: UOF <sub>4</sub> to UF <sub>4</sub> (OH) <sub>2</sub>                                                                | 15        |
| 8          | Elementary step 4: dimerization of UF <sub>4</sub> (OH) <sub>2</sub>                                                                    | 18        |
| 9          | Additional isolated species                                                                                                             | 21        |
| <b>III</b> | <b>Supplementary figures</b>                                                                                                            | <b>22</b> |
| 10         | Isolated and pre-reactive species                                                                                                       | 22        |
| 11         | Elementary step 1, from UF <sub>6</sub> to UF <sub>5</sub> OH: DSD-BLYP level diagrams and PBE0 geometrical structures                  | 23        |
| 12         | Elementary step 2, from UF <sub>5</sub> OH to UOF <sub>4</sub> : DSD-BLYP level diagrams and PBE0 geometrical structures                | 25        |
| 13         | Elementary step 3, from UOF <sub>4</sub> to UF <sub>4</sub> (OH) <sub>2</sub> : DSD-BLYP level diagrams and PBE0 geometrical structures | 26        |
| 14         | Elementary step 4, dimerization of UF <sub>4</sub> (OH) <sub>2</sub> : DSD-BLYP level diagrams and PBE0 geometrical structures          | 28        |
| <b>IV</b>  | <b>Supplementary files</b>                                                                                                              | <b>28</b> |
| <b>V</b>   | <b>References</b>                                                                                                                       | <b>32</b> |
| 15         | Full form of references abbreviated in the main document                                                                                | 32        |
| 16         | Supporting Information bibliography                                                                                                     | 32        |

<sup>a</sup> Center for Computing Research (CCR), Sandia National Laboratories, Albuquerque, New Mexico, USA. Fax: +1  
This journal is © The Royal Society of Chemistry [year]ndia.gov

<sup>b</sup> ENSCO, Inc., 4849 North Wickham Road, Melbourne, Florida, 32940, USA

<sup>c</sup> Combustion Research Facility, Sandia National Laboratories, Livermore, California, USA.

**Table 1** Measured IR frequencies from Shimanouchi et al.<sup>1</sup>, the computed harmonic modes used to generate the statistical analysis in the main text.

| Exp. | PBE    | PBE0   | LCCD   | CCSD(T) |
|------|--------|--------|--------|---------|
| 142  | 137.18 | 135.5  | 145.48 | 139.15  |
| 142  | 143.25 | 138.79 | 145.71 | 139.15  |
| 142  | 144.63 | 141.29 | 145.72 | 139.22  |
| 186  | 188.86 | 181.47 | 191.44 | 186.21  |
| 186  | 193.35 | 183.73 | 191.65 | 186.21  |
| 186  | 194.05 | 184.7  | 191.70 | 186.26  |
| 202  | 262.50 | 201.42 | 207.70 | 202.14  |
| 202  | 267.00 | 204.99 | 207.71 | 202.14  |
| 202  | 267.74 | 205.59 | 207.71 | 202.15  |
| 533  | 525.74 | 547.04 | 549.38 | 540.57  |
| 533  | 525.99 | 547.19 | 549.44 | 540.59  |
| 667  | 639.42 | 634.73 | 648.58 | 632.3   |
| 667  | 714.38 | 634.90 | 648.59 | 632.3   |
| 667  | 720.63 | 635.11 | 648.69 | 632.31  |
| 667  | 746.09 | 691.33 | 707.50 | 685.3   |

**Table 2** Optimized interatomic distances between U and other atoms in the UF<sub>6</sub>⋯H<sub>2</sub>O adduct. Triple- $\zeta$  basis sets were used, as described in the main text. Taking the LCCD values as reference, mean unsigned errors (MUEs) and mean signed errors (MSE) are also given to facilitate comparison with past studies.

| UF <sub>6</sub> -H <sub>2</sub> O<br>Methods | Bond lengths (Å) |        |        |        |        |        | Stats (pm) |      |       |
|----------------------------------------------|------------------|--------|--------|--------|--------|--------|------------|------|-------|
|                                              | O-U              | U-F    | U-F    | U-F    | U-F    | U-F    | MUE        | MSE  |       |
| LCCD                                         | 2.7159           | 1.9997 | 2.0295 | 2.0290 | 2.0016 | 2.0015 | 1.9986     | —    | —     |
| PBE0+D3BJ                                    | 2.7853           | 1.9861 | 2.0113 | 2.0110 | 1.9872 | 1.9872 | 1.9855     | 14.9 | -0.31 |
| PBE+D3BJ                                     | 2.8293           | 2.0141 | 2.0415 | 2.0412 | 2.0148 | 2.0150 | 2.0136     | 18.1 | 2.77  |
| Hu et al.                                    | 2.8971           | 2.0233 | 2.0468 | 2.0470 | 2.0243 | 2.0239 | 2.0231     | 28.9 | 4.42  |
| Garrison and Becnel                          | 2.85             | 2.04   | 2.04   | 2.04   | 2.04   | 2.04   | 2.04       | 27.9 | 4.49  |

## Part I

### Supplementary benchmark studies

This section describes benchmarking methods and data referenced without explanation in the main text.

#### 1 Benchmark analysis of the vibrational frequencies of UF<sub>6</sub> and UF<sub>6</sub>⋯H<sub>2</sub>O

In this section we discuss benchmark studies referenced in Section 4.1.1 of the main text. The objective is an evaluation of the performance of the dispersion-corrected density functional theory (DFT) methods for generating accurate geometrical parameters for UF<sub>6</sub> and the UF<sub>6</sub>⋯H<sub>2</sub>O adduct. Table 1 tabulates experimental and calculated IR frequencies for UF<sub>6</sub>, while Table 2 collects intra- and intermolecular bond lengths predicted by two levels of density functional theory and linearized coupled-cluster doubles (LCCD) with the cc-pVTZ basis set. Comparisons are made with geometrical parameters reported previously by Hu et al.<sup>2</sup> and by Garrison and Becnel.<sup>3</sup>

Bond distances in the UF<sub>6</sub>⋯H<sub>2</sub>O adduct generally contract with increasing level of theory. PBE-level optimizations overestimate the intermolecular U-O distance by 5–10% for both our calculations and the calculations of Hu et al. In addition to considering the intermolecular distance, all of the U-F bonds in UF<sub>6</sub> are distorted by the non-bonding interaction with H<sub>2</sub>O. For all bond lengths considered, our PBE0-based approach outperforms PBE-based approaches using LCCD-level parameters as the reference.

Table 2 collects mean signed errors (MSE) and mean unsigned errors (MUE), with LCCD-optimized parameters used as reference for the seven bond lengths discussed above. Comparing MUEs between our dispersion-corrected calculations and the results of Hu et al., the D3BJ correction accounts for an improvement of about 10 pm. The MUE for PBE0+D3BJ further improves the PBE+D3BJ MUE by 3 pm. The advantage of PBE0+D3BJ is apparent from the MSEs, where PBE0+D3BJ returns -0.3 pm compared to the PBE-level MSEs of 2.8 or 4.4 pm. We conclude that PBE0+D3BJ is a very reliable method for predicting geometrical parameters of U-containing H-bonded adducts.

#### 2 Estimation of the Hartree-Fock extrapolation error for the UF<sub>6</sub>+H<sub>2</sub>O barrier height

In this section we examine consider the error associated with extrapolation of the Hartree-Fock (HF) energy to the complete basis set limit (CBS). Many extrapolation formulae exist for approximation of the CBS-limit value. Below are listed the methods employed here:

1. The exponential extrapolation scheme<sup>4</sup>

| Extrapolation formula                              | $E^{\text{HF}}[\text{UF}_6]$<br>(hartree) | $E^{\text{HF}}[\text{H}_2\text{O}]$<br>(hartree) | $E^{\text{HF}}[\text{UF}_6 \cdots \text{H}_2\text{O}]^\ddagger$<br>(hartree) | $E_a$<br>(kcal/mol) |
|----------------------------------------------------|-------------------------------------------|--------------------------------------------------|------------------------------------------------------------------------------|---------------------|
| Exponential extrapolation scheme                   | -1131.458402                              | -76.38407349                                     | -1207.820482                                                                 | 13.800              |
| Power function extrapolation scheme                | -1131.489589                              | -76.38736511                                     | -1207.854274                                                                 | 14.232              |
| A Mixed Gaussian/Exponential Extrapolation Scheme  | -1131.468157                              | -76.38561315                                     | -1207.831206                                                                 | 14.159              |
| Equation 11 from [8]                               | -1131.483116                              | -76.38669314                                     | -1207.847265                                                                 | 14.147              |
| Three parameters expression with integer exponents | -1131.473947                              | -76.38620763                                     | -1207.837481                                                                 | 14.228              |
| Two parameters expression with integer exponent 4  | -1131.469611                              | -76.38590830                                     | -1207.832818                                                                 | 14.245              |
| Two parameters expression with integer exponent 3  | -1131.478952                              | -76.38707748                                     | -1207.842994                                                                 | 14.455              |
| Average and standard deviation                     | —                                         | —                                                | —                                                                            | 14.181±0.169        |

**Table 3** Complete-basis-limit HF energies for the separated  $\text{UF}_6 + \text{H}_2\text{O}$  reactants, the  $[\text{UF}_6 \cdots \text{H}_2\text{O}]^\ddagger$  transition state structure, and the associated barrier height ( $E_a^{\text{HF}}$ ).

- The power function extrapolation scheme (Ref.<sup>5</sup>)
- A Mixed Gaussian/Exponential Extrapolation Scheme (Ref.<sup>6-8</sup>)
- Extrapolation using Equation 11 from Ref.<sup>9</sup>
- Three-parameter expression with integer exponents (Ref.<sup>9</sup>)
- Two-parameter expression with integer exponent 4 (Ref.<sup>9</sup>)
- Two-parameter expression with integer exponent 3 (Ref.<sup>5</sup>)

These were computed using the web interface created by Vasilyev.<sup>10</sup> While many studies exist evaluating the accuracy of CBS extrapolation formulae for main-group phenomena, it is unclear which approach works best for actinides. Such an analysis is best left to a separate study.

Seeking a rough estimate of the error introduced by CBS extrapolation of the HF energy, we gathered values produced by various extrapolation formulae and computed the standard deviation. A sample size of seven is quite small, far fewer than the rule-of-thumb for a lower bound on the sample size (i.e., 30), so we anticipate obtaining an order-of-magnitude estimate.

Table 3 collects CBS-extrapolated HF energies of individual species and the barrier height corresponding to the  $[\text{UF}_6 \cdots \text{H}_2\text{O}]^\ddagger$  structure. Averaging over the barrier heights produced by all extrapolation formulae,  $14.181 \pm 0.169$  kcal/mol is obtained. Of particular interest to the present study is the standard deviation, from which the 95% confidence interval is found to be 0.338 kcal/mol. In most cases this is much smaller than spin-orbit or zero-point vibrational energy corrections.

### 3 A comparison of initiation-step barrier heights produced by various methods

In this section we compile energy differences associated with several potential initiation steps, as predicted by several electronic structure methods. These are the barriers used in the statistical analysis described in Section 4.1.2 and Table 4 of the main text.

Two classes of energy differences are considered. The first is the what is conventionally referred to as the activation energy, i.e., the energy difference between the transition state and the separated reactants. An example of this is the energy difference formed by  $E([\text{UF}_6 \cdots \text{H}_2\text{O}]^\ddagger) - E(\text{UF}_6 + \text{H}_2\text{O})$ . The second is the difference between the the transition state and the pre-reactive van der Waals (vdW) energy minimum, for which both forward and reverse reactions are considered. Here an example is  $E([\text{UF}_6 \cdots \text{H}_2\text{O}]^\ddagger) - E(\text{UF}_6 \cdots \text{H}_2\text{O})$ , with emphasis on both terms containing center dots, meaning they are both clusters. Barriers taken with respect to separated species vs vdW clusters represent cases where dispersion is effectively turned off and on. This adds diversity to the barrier height set used in the statistical analysis.

Table 4 collects barrier heights associated with  $\text{UF}_6:\text{H}_2\text{O}$  ratios of 1:1 and 1:2. Literature data by Hu et al. was computed using PBE0 and a triple- $\zeta$  basis set of Slater-type orbitals. The DFT computations performed as part of this study used the Gaussian-based triple- $\zeta$  basis set described in Section 3 of the main text. As a reminder, each of the DFT methods employed here included empirical corrections for two-body (D3BJ) and three-body (ABC) intermolecular interactions. Meanwhile, the DLPNO-CCSD(T) and CCSD(T) methods represent composite schemes, also described in Section 3 the main text. For further discussion of the relative performance of these methods for generating barrier heights, see Section 4.1.2 of the main text.

**Table 4** Forward and reverse barrier heights for several potential hydrolysis initiation steps. Reactions are labeled by their stoichiometric ratios whether the energy difference is taken with respect to separated reactants or the well structure.

| Method        | $\frac{E(\text{UF}_6 \cdots \text{H}_2\text{O})^\ddagger}{-E(\text{UF}_6 + \text{H}_2\text{O})}$ | $\frac{E(\text{UF}_6 \cdots 2\text{H}_2\text{O})^\ddagger}{-E(\text{UF}_6 + 2\text{H}_2\text{O})}$ | $\frac{E(\text{UF}_6 \cdots 2\text{H}_2\text{O})^\ddagger}{-E(\text{UF}_6 + 2\text{H}_2\text{O})}$ | $\frac{E(\text{UF}_6 \cdots \text{H}_2\text{O})^\ddagger}{-E(\text{UF}_6 \cdots \text{H}_2\text{O})}$ | $\frac{E(\text{UF}_6 \cdots \text{H}_2\text{O})^\ddagger}{-E(\text{UF}_5\text{OH} \cdots \text{HF})}$ | $\frac{E(\text{UF}_6 \cdots 2\text{H}_2\text{O})^\ddagger}{-E(\text{UF}_6 \cdots 2\text{H}_2\text{O})}$ | $\frac{E(\text{UF}_6 \cdots 2\text{H}_2\text{O})^\ddagger}{-E(\text{UF}_6 \cdots 2\text{H}_2\text{O})}$ | $\frac{E(\text{UF}_6 \cdots 2\text{H}_2\text{O})^\ddagger}{-E(\text{UF}_5\text{OH} \cdots \text{HF})}$ | $\frac{E(\text{UF}_6 \cdots 2\text{H}_2\text{O})^\ddagger}{-E(\text{UF}_5\text{OH} \cdots \text{HF})}$ | $\frac{E(\text{UF}_6 \cdots 2\text{H}_2\text{O})^\ddagger}{-E(\text{UF}_5\text{OH} \cdots \text{HF})}$ |
|---------------|--------------------------------------------------------------------------------------------------|----------------------------------------------------------------------------------------------------|----------------------------------------------------------------------------------------------------|-------------------------------------------------------------------------------------------------------|-------------------------------------------------------------------------------------------------------|---------------------------------------------------------------------------------------------------------|---------------------------------------------------------------------------------------------------------|--------------------------------------------------------------------------------------------------------|--------------------------------------------------------------------------------------------------------|--------------------------------------------------------------------------------------------------------|
| Hu et al.     | 18.39                                                                                            | 13.41                                                                                              | 10.43                                                                                              | 18.59                                                                                                 | 11.38                                                                                                 | 17.3                                                                                                    | 14.32                                                                                                   | 13.59                                                                                                  | 3.91                                                                                                   | 3.91                                                                                                   |
| PBE0          | 13.94                                                                                            | 2.18                                                                                               | -1.72                                                                                              | 18.91                                                                                                 | 14.9                                                                                                  | 15.61                                                                                                   | 11.71                                                                                                   | 19.66                                                                                                  | 9.75                                                                                                   | 9.75                                                                                                   |
| B97M          | 12.53                                                                                            | 3.01                                                                                               | -0.38                                                                                              | 19.19                                                                                                 | 12.46                                                                                                 | 19.24                                                                                                   | 15.84                                                                                                   | 15.15                                                                                                  | 7.41                                                                                                   | 7.41                                                                                                   |
| B2PLYP        | 14.43                                                                                            | 4.41                                                                                               | 0.57                                                                                               | 18.54                                                                                                 | 14.63                                                                                                 | 17.83                                                                                                   | 13.99                                                                                                   | 19.65                                                                                                  | 10.09                                                                                                  | 10.09                                                                                                  |
| DSD-BLYP      | 14.29                                                                                            | 4.57                                                                                               | 0.83                                                                                               | 18.61                                                                                                 | 15.00                                                                                                 | 17.98                                                                                                   | 14.24                                                                                                   | 19.83                                                                                                  | 10.51                                                                                                  | 10.51                                                                                                  |
| DSD-PBEB95    | 15.24                                                                                            | 6.11                                                                                               | 2.71                                                                                               | 19.46                                                                                                 | 15.15                                                                                                 | 18.82                                                                                                   | 15.42                                                                                                   | 19.45                                                                                                  | 10.88                                                                                                  | 10.88                                                                                                  |
| DSD-PBEP86    | 14.33                                                                                            | 4.60                                                                                               | 0.87                                                                                               | 18.40                                                                                                 | 14.82                                                                                                 | 17.75                                                                                                   | 14.03                                                                                                   | 19.72                                                                                                  | 10.53                                                                                                  | 10.53                                                                                                  |
| PBE0-DH       | 15.75                                                                                            | 6.56                                                                                               | 2.44                                                                                               | 18.61                                                                                                 | 14.70                                                                                                 | 17.90                                                                                                   | 13.78                                                                                                   | 20.10                                                                                                  | 10.40                                                                                                  | 10.40                                                                                                  |
| PBE-QIDH      | 15.26                                                                                            | 5.92                                                                                               | 1.81                                                                                               | 18.56                                                                                                 | 14.93                                                                                                 | 17.92                                                                                                   | 13.81                                                                                                   | 20.23                                                                                                  | 10.59                                                                                                  | 10.59                                                                                                  |
| PWB95         | 14.90                                                                                            | 5.79                                                                                               | 2.34                                                                                               | 19.26                                                                                                 | 14.30                                                                                                 | 18.53                                                                                                   | 15.08                                                                                                   | 18.70                                                                                                  | 10.13                                                                                                  | 10.13                                                                                                  |
| DLPNO-CCSD(T) | 14.54                                                                                            | 5.70                                                                                               | 2.42                                                                                               | 18.70                                                                                                 | 16.12                                                                                                 | 17.95                                                                                                   | 14.66                                                                                                   | 19.39                                                                                                  | 11.29                                                                                                  | 11.29                                                                                                  |
| CCSD(T)       | 13.80                                                                                            | 5.18                                                                                               | 1.90                                                                                               | 17.62                                                                                                 | 15.41                                                                                                 | 19.96                                                                                                   | 14.08                                                                                                   | 22.46                                                                                                  | 11.44                                                                                                  | 11.44                                                                                                  |

## Part II

# Computed PBE0-level molecular geometries, energies, and properties

This section collects geometries, energies, and properties of individual species, van der Waals clusters, and transition state structures.

## 4 Pre-reaction dimer and trimer formation

This section tabulates PBE0-level total energies (hartree), dipole moments (debye), zero-point energies (hartree), and atomic positions (angstroms) for each molecular species.

### 4.1 $\text{H}_2\text{O} + \text{H}_2\text{O} \rightarrow \text{H}_2\text{O} \cdots \text{H}_2\text{O}$

|                          |                  |                  |           |   |                                                    |
|--------------------------|------------------|------------------|-----------|---|----------------------------------------------------|
| 3                        |                  |                  |           | 6 |                                                    |
|                          |                  |                  |           |   | H2O-H2O E = -152.985599508232 Dipole = 2.73228 ZPE |
| H2O E = -76.488010445886 | Dipole = 2.06452 | ZPE = 0.02147735 |           | O | -2.464929 -0.980943                                |
| H                        | -3.070831        | 0.042655         | 1.154238  | O | -4.190234 1.336355                                 |
| H                        | -3.250390        | 0.292340         | -0.336747 | H | -3.106514 -0.256160                                |
| O                        | -2.797779        | 0.624004         | 0.441509  | H | -2.765117 -1.567196                                |
|                          |                  |                  |           | H | -3.558151 2.034161                                 |
|                          |                  |                  |           | H | -4.525054 1.529782                                 |

### 4.2 $\text{H}_2\text{O} \cdots \text{H}_2\text{O} + \text{H}_2\text{O} \rightarrow \text{H}_2\text{O} \cdots \text{H}_2\text{O} \cdots \text{H}_2\text{O}$

|   |           |           |  |  |                                                                     |
|---|-----------|-----------|--|--|---------------------------------------------------------------------|
| 9 |           |           |  |  |                                                                     |
|   |           |           |  |  | H2O-H2O-H2O E = -229.494872384260 Dipole = 1.22166 ZPE = 0.07362531 |
| O | -2.543640 | -0.965215 |  |  | -1.079284                                                           |
| O | -4.792523 | 0.285970  |  |  | -0.089917                                                           |
| H | -2.411638 | -1.169099 |  |  | -2.006986                                                           |
| H | -3.030272 | -1.723712 |  |  | -0.703673                                                           |
| H | -3.949095 | 0.135831  |  |  | -0.558310                                                           |
| H | -4.624530 | 0.986295  |  |  | 0.542762                                                            |
| O | -4.491532 | -2.444433 |  |  | 0.178240                                                            |
| H | -4.844251 | -1.541889 |  |  | 0.293127                                                            |
| H | -4.455289 | -2.835367 |  |  | 1.052721                                                            |

### 4.3 $\text{UF}_6 + \text{UF}_6 \rightarrow \text{UF}_6 \cdots \text{UF}_6$

|   |           |           |  |  |                                                                |
|---|-----------|-----------|--|--|----------------------------------------------------------------|
| 7 |           |           |  |  |                                                                |
|   |           |           |  |  | UF6 E = -30408.579376006292 Dipole = 0.000000 ZPE = 0.01200091 |
| U | 0.000000  | 0.000000  |  |  | -0.000000                                                      |
| F | -1.419399 | -0.699589 |  |  | 1.197986                                                       |
| F | 1.419399  | 0.699589  |  |  | -1.197986                                                      |
| F | -0.483946 | 1.856133  |  |  | 0.509822                                                       |
| F | 0.483946  | -1.856132 |  |  | -0.509822                                                      |
| F | 1.300394  | -0.072402 |  |  | 1.497670                                                       |
| F | -1.300394 | 0.072403  |  |  | -1.497670                                                      |

14

UF6-UF6 E = -60817.163090674308 Dipole = 0.01896 ZPE = 0.02436804

|   |           |           |           |
|---|-----------|-----------|-----------|
| U | -0.067314 | 0.215948  | -0.916715 |
| F | -1.449216 | -1.083467 | -0.334524 |
| F | 1.307836  | 1.522203  | -1.504497 |
| F | -1.414847 | 1.669847  | -0.854287 |
| F | 1.269376  | -1.246000 | -0.982606 |
| F | 0.396757  | 0.569916  | 0.985018  |
| F | -0.537378 | -0.137150 | -2.812240 |
| U | 3.814981  | 2.189130  | 1.710755  |
| F | 2.814339  | 1.338758  | 3.195689  |
| F | 4.824578  | 3.039506  | 0.230500  |
| F | 4.228523  | 3.737973  | 2.880696  |
| F | 3.408289  | 0.634815  | 0.537293  |
| F | 5.474969  | 1.287610  | 2.317806  |
| F | 2.159381  | 3.099020  | 1.101203  |

## 5 Elementary step 1: UF<sub>6</sub>OH to UF<sub>5</sub>OH

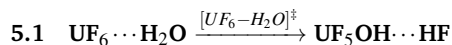

10

UF6-H2O E = -30485.075971586088 Dipole = 3.83971 ZPE = 0.03674404

|   |           |           |           |
|---|-----------|-----------|-----------|
| U | -0.024766 | 0.000418  | 0.003039  |
| F | 1.169534  | 0.703078  | -1.421242 |
| F | -1.276459 | -0.375693 | -1.525752 |
| F | 0.686810  | -1.811809 | -0.386334 |
| F | 1.494801  | 0.251517  | 1.258703  |
| F | -0.424817 | 1.909923  | 0.375209  |
| F | -0.903662 | -0.895994 | 1.574362  |
| H | -3.067173 | 0.067863  | 1.167241  |
| H | -3.248290 | 0.316672  | -0.343172 |
| O | -2.719978 | 0.565025  | 0.420946  |

10

UF6-H2O-TS E = -30485.043946645150 Dipole = 2.81669 ZPE = 0.03331745

|   |           |           |           |
|---|-----------|-----------|-----------|
| U | -0.005798 | 0.001842  | -0.005452 |
| O | -1.052442 | 1.963080  | 0.339769  |
| F | 1.132672  | 2.119345  | 0.270443  |
| F | -1.905896 | -0.273329 | -0.538503 |
| F | -0.419653 | -0.381342 | 1.888514  |
| F | 0.108495  | -1.947644 | -0.402136 |
| F | 0.379565  | 0.411298  | -1.900266 |
| F | 1.904116  | -0.256932 | 0.444860  |
| H | -1.837234 | 2.265808  | -0.122705 |
| H | 0.075175  | 2.435876  | 0.290476  |

10

UF5OH-HF E = -30485.067699861014 Dipole = 1.15521 ZPE = 0.03485172

|   |           |           |          |
|---|-----------|-----------|----------|
| H | -0.600632 | -0.226744 | 0.507143 |
| O | -2.372159 | -0.137242 | 2.685227 |
| H | -1.646912 | -0.689099 | 2.326078 |
| F | -0.393819 | -0.979689 | 1.019547 |
| F | -1.855862 | 2.641734  | 2.853163 |
| U | -3.129621 | 1.486720  | 1.843845 |
| F | -1.701586 | 1.225803  | 0.393874 |
| F | -4.482267 | 1.648988  | 3.301151 |
| F | -4.378530 | 0.374862  | 0.757571 |
| F | -3.851993 | 3.108665  | 0.960528 |

5.2  $\text{UF}_6 \cdots \text{H}_2\text{O} \cdots \text{UF}_6 \xrightarrow{[\text{UF}_6-\text{H}_2\text{O}-\text{UF}_6]^\ddagger} \text{UF}_5\text{OH} \cdots \text{HF} \cdots \text{UF}_6$

17

UF6-H2O-UF6 E = -60893.662392400962 Dipole = 3.61959 ZPE = 0.04949497

|   |           |           |           |
|---|-----------|-----------|-----------|
| U | 2.197373  | -0.574463 | -1.121183 |
| F | 2.841719  | -0.205170 | 0.718522  |
| F | 1.773170  | -1.018779 | -3.024536 |
| F | 3.343406  | -2.197774 | -1.141592 |
| F | 0.872809  | -1.809005 | -0.271751 |
| F | 3.797952  | 0.359789  | -1.837442 |
| F | 1.438767  | 1.280795  | -1.077971 |
| O | -0.517323 | -0.217276 | -1.770839 |
| H | -0.953178 | -0.966266 | -2.188306 |
| H | -0.684098 | 0.546395  | -2.331751 |
| F | -2.511371 | -1.139022 | 0.204167  |
| F | -0.301785 | 0.436366  | 1.202758  |
| U | -2.283416 | 0.538217  | 1.246933  |
| F | -2.347365 | 1.655841  | -0.400565 |
| F | -2.274831 | -0.534725 | 2.913920  |
| F | -4.259424 | 0.673895  | 1.364573  |
| F | -2.133353 | 2.195032  | 2.325183  |

17

UF6-H2O-UF6-TS E = -60893.629419908983 Dipole = 2.67313 ZPE = 0.04603016

|   |           |           |           |
|---|-----------|-----------|-----------|
| U | 2.171773  | -1.620206 | -0.834283 |
| F | 3.969527  | -2.384155 | -0.476702 |
| F | 0.378384  | -0.859759 | -1.264614 |
| F | 1.550970  | -3.393161 | -1.472449 |
| F | 1.626332  | -2.117587 | 0.999737  |
| F | 2.752971  | -1.181161 | -2.679915 |
| F | 2.828504  | 0.158289  | -0.242325 |
| O | -0.454727 | 2.143184  | -0.131539 |
| H | 0.269532  | 1.492285  | 0.586103  |
| H | -0.499549 | 3.102502  | -0.114190 |
| F | 0.294739  | 0.571549  | 1.220960  |
| F | -2.958852 | 2.560690  | 0.380610  |
| U | -2.079059 | 0.799417  | 0.669593  |
| F | -2.360437 | 0.336055  | -1.226587 |
| F | -1.951255 | 1.328750  | 2.567046  |
| F | -1.614121 | -1.102428 | 0.958800  |
| F | -3.924735 | 0.165737  | 1.059754  |

17

UF5OH-HF-UF6 E = -60893.653551555755 Dipole = 0.86097 ZPE = 0.04729485

|   |           |           |           |
|---|-----------|-----------|-----------|
| U | -1.590438 | -2.242163 | -2.320288 |
| F | -1.708309 | -4.016284 | -1.469733 |
| F | -1.418308 | -0.512297 | -3.261910 |
| F | -2.474077 | -2.999596 | -3.927261 |
| F | -3.361362 | -1.655564 | -1.664826 |
| F | 0.165291  | -2.775875 | -3.061354 |
| F | -0.595477 | -1.410281 | -0.757247 |
| O | -0.884849 | 0.089657  | 1.529173  |
| H | -3.122485 | -2.032975 | 1.257514  |
| H | -0.604806 | -0.507323 | 0.808717  |
| F | -2.585711 | -2.690191 | 0.869301  |
| F | -1.393553 | 2.894866  | 1.496459  |
| U | -2.489238 | 1.234479  | 1.668997  |
| F | -2.676076 | 1.118374  | -0.316547 |
| F | -2.291495 | 1.287531  | 3.648060  |
| F | -3.631831 | -0.463140 | 1.800439  |
| F | -4.128007 | 2.340312  | 1.811476  |

### 5.3 $\text{UF}_6 \cdots \text{H}_2\text{O} \cdots \text{H}_2\text{O} \xrightarrow{[\text{UF}_6-\text{H}_2\text{O}-\text{H}_2\text{O}]_{\text{a}}^{\ddagger}} \text{UF}_5\text{OH} \cdots \text{H}_2\text{O} \cdots \text{HF}$

13

UF6-H2O-H2O E = -30561.58303010532 Dipole = 4.47158 ZPE = 0.06244973

|   |           |           |           |
|---|-----------|-----------|-----------|
| U | -0.083513 | 0.084713  | -0.011949 |
| F | 1.798614  | 0.330762  | 0.580559  |
| F | -1.979139 | 0.307024  | -0.597090 |
| F | -0.395720 | -0.431533 | 1.928596  |
| F | 0.721346  | -1.543396 | -0.880263 |
| F | -0.376749 | 1.924823  | 0.695229  |
| F | 0.354853  | 0.927724  | -1.759771 |
| O | -1.482142 | -2.081194 | 0.165215  |
| O | -2.801874 | -1.897289 | 2.490411  |
| H | -2.051611 | -2.127234 | 0.968009  |
| H | -0.954411 | -2.882975 | 0.129395  |
| H | -2.175601 | -1.280119 | 2.885886  |
| H | -3.656819 | -1.459647 | 2.507789  |

13

UF6-H2O-H2O-TSa E = -30561.551306999030 Dipole = 5.25006 ZPE = 0.05792905

|   |           |           |           |
|---|-----------|-----------|-----------|
| U | -0.012501 | 0.026300  | 0.007447  |
| F | 1.995169  | 0.215551  | -0.131094 |
| F | -0.210933 | 0.251416  | -1.951221 |
| F | 0.426695  | -1.901672 | -0.255513 |
| F | 0.260735  | -0.223640 | 1.951854  |
| F | -1.866394 | -0.682468 | 0.000598  |
| O | 0.370961  | 2.186178  | 0.034568  |
| H | 1.252746  | 2.573715  | 0.274062  |
| F | -1.565511 | 1.641381  | 0.912568  |
| O | 2.843547  | 2.879486  | 0.598898  |
| H | -0.676727 | 2.265627  | 0.621705  |
| H | 3.256251  | 2.027704  | 0.417792  |
| H | 3.313961  | 3.527421  | 0.068337  |



13

UF5OH-H2O-HF E = -30561.574967880275 Dipole = 3.76393 ZPE = 0.05976097

|   |           |           |           |
|---|-----------|-----------|-----------|
| U | 0.149886  | -0.613518 | -0.818394 |
| F | 2.031443  | -1.072625 | -1.320928 |
| F | -0.043007 | 0.360126  | -2.557336 |
| F | -0.541663 | -2.266731 | -1.683025 |
| F | 0.355248  | -1.619472 | 0.896520  |
| F | -1.709049 | -0.090569 | -0.300163 |
| O | 0.826366  | 1.052181  | 0.040481  |
| H | 1.734963  | 1.515581  | 0.058099  |
| F | 0.362413  | 3.420106  | 1.161102  |
| O | 2.873659  | 2.525953  | 0.283479  |
| H | 0.174788  | 2.557854  | 0.845867  |
| H | 3.301818  | 2.893052  | -0.494696 |
| H | 2.371203  | 3.244521  | 0.694062  |

5.4  $\text{UF}_6 \cdots \text{H}_2\text{O} \cdots \text{H}_2\text{O} \xrightarrow{[\text{UF}_6-\text{H}_2\text{O}-\text{H}_2\text{O}]_{\text{b}}^{\ddagger}} \text{UF}_5\text{OH} \cdots \text{HF} \cdots \text{H}_2\text{O}$ 

13

UF6-H2O-H2O-TSb E = -30561.558782938060 Dipole = 5.98002 ZPE = 0.05901169

|   |           |           |           |
|---|-----------|-----------|-----------|
| U | 0.019008  | 0.057329  | 0.057857  |
| F | -0.301526 | -0.250542 | 2.002739  |
| F | 1.867377  | 0.444680  | 0.689068  |
| F | 0.388583  | -1.903789 | 0.152883  |
| F | -1.705870 | -0.488073 | -0.762181 |
| F | 0.776127  | -0.169327 | -1.789739 |
| O | 0.253669  | 2.100230  | -0.768370 |
| H | 0.851723  | 2.143767  | -1.520446 |
| F | -1.562318 | 1.539340  | 0.883554  |
| O | -1.465963 | 3.636498  | -0.073309 |
| H | -1.677103 | 2.675584  | 0.486449  |
| H | -0.613366 | 3.184765  | -0.511163 |
| H | -1.193341 | 4.329535  | 0.536659  |

13

UF5OH-HF-H2O E = -30561.584690838819 Dipole = 4.00201 ZPE = 0.06029468

|   |           |           |           |
|---|-----------|-----------|-----------|
| U | 0.324492  | 0.178999  | -0.010162 |
| F | 0.402619  | 1.057310  | 1.788294  |
| F | 1.806336  | 1.334443  | -0.699603 |
| F | 1.660847  | -1.157978 | 0.601418  |
| F | -1.214805 | -0.982991 | 0.718277  |
| F | 0.212417  | -0.783102 | -1.758884 |
| O | -1.011818 | 1.465983  | -0.597232 |
| H | -1.975018 | 1.691288  | -0.404210 |
| F | -3.433826 | 1.790270  | -0.009554 |
| H | -3.669977 | 0.965006  | 0.479830  |
| O | -3.837824 | -0.317922 | 1.147273  |
| H | -4.073916 | -0.291069 | 2.078072  |
| H | -2.992527 | -0.792237 | 1.080481  |

5.5  $\text{UF}_6 \cdots \text{H}_2\text{O} \cdots \text{H}_2\text{O} \cdots \text{H}_2\text{O} \xrightarrow{[\text{UF}_6-\text{H}_2\text{O}-\text{H}_2\text{O}-\text{H}_2\text{O}]_{\text{a}}^{\ddagger}} \text{UF}_5\text{OH} \cdots \text{H}_2\text{O} \cdots \text{HF} \cdots \text{H}_2\text{O}$

16

UF6-H2O-H2O-H2Oa E = -30638.088924426531 Dipole = 4.68072 ZPE = 0.08728389

|   |           |           |           |
|---|-----------|-----------|-----------|
| U | -0.017653 | 0.077394  | 0.065366  |
| F | 0.091561  | -0.161401 | 2.033957  |
| F | -0.096839 | 0.174582  | -1.926230 |
| F | 1.527432  | 1.382146  | 0.369724  |
| F | -1.969357 | 0.543548  | 0.458827  |
| F | 1.586047  | -1.085799 | -0.204839 |
| F | -0.930405 | -1.690671 | -0.131789 |
| O | 1.550934  | 3.933553  | -0.834058 |
| O | -0.583888 | 2.389896  | -0.401834 |
| H | 2.077270  | 3.304462  | -0.325493 |
| H | 1.976706  | 3.999774  | -1.692279 |
| O | -3.202586 | 2.769820  | -0.760629 |
| H | 0.091592  | 3.054857  | -0.664586 |
| H | -1.497348 | 2.666364  | -0.639724 |
| H | -3.364125 | 1.980116  | -0.229867 |
| H | -3.635340 | 2.613360  | -1.603545 |

16

UF6-H2O-H2O-H2O-TSa E = -30638.067043347441 Dipole = 5.19377 ZPE = 0.08383441

|   |           |           |           |
|---|-----------|-----------|-----------|
| U | 0.054550  | 0.093601  | 0.107981  |
| F | -0.608264 | -0.471065 | 1.906970  |
| F | 1.810217  | 0.252118  | 1.115632  |
| F | 0.488846  | -1.848435 | -0.042801 |
| F | -1.244972 | -0.399845 | -1.327544 |
| F | 1.234778  | 0.437475  | -1.490147 |
| O | 0.297326  | 2.226504  | 0.241224  |
| O | -1.736641 | 3.422553  | 0.647864  |
| O | 2.888401  | 2.673284  | -0.137362 |
| H | 1.231544  | 2.531707  | 0.090083  |
| F | -1.964800 | 1.122262  | 0.509196  |
| H | -0.715092 | 3.116272  | 0.482290  |
| H | -1.834338 | 3.776087  | 1.538010  |
| H | 3.181473  | 1.948350  | 0.427695  |
| H | 3.057506  | 2.367975  | -1.034675 |
| H | -2.054533 | 2.365156  | 0.623579  |

16

UF5OH-H2O-HF-H2O E = -30638.089318740618 Dipole = 6.80138 ZPE = 0.08569936

|   |           |           |           |
|---|-----------|-----------|-----------|
| U | 0.200951  | -0.409569 | -0.148954 |
| F | -1.833483 | -0.906264 | 0.227088  |
| F | 0.461392  | -0.142045 | 1.840782  |
| F | 0.703350  | -2.317353 | 0.047205  |
| F | -0.170075 | -0.716893 | -2.113429 |
| F | 2.133638  | 0.065348  | -0.511488 |
| F | -0.991220 | 3.392734  | 1.169454  |
| O | -0.351036 | 1.369777  | -0.313804 |
| O | -2.603671 | 2.461175  | -0.718500 |
| O | -3.927965 | 0.550722  | 0.015233  |
| H | -1.697776 | 2.001954  | -0.800792 |
| H | -0.481602 | 2.681116  | 0.805409  |
| H | -3.266964 | 1.683080  | -0.353013 |
| H | -2.418097 | 3.106260  | -0.005973 |
| H | -4.472360 | 0.564159  | 0.806509  |
| H | -3.233301 | -0.145765 | 0.133473  |

5.6 UF<sub>6</sub>⋯H<sub>2</sub>O⋯H<sub>2</sub>O⋯H<sub>2</sub>O  $\xrightarrow{[UF_6-H_2O-H_2O-H_2O]^\ddagger_b}$  UF<sub>5</sub>OH⋯H<sub>2</sub>O⋯H<sub>2</sub>O⋯HF

16

UF6-H2O-H2O-H2Ob E = -30638.09076027500 Dipole = 3.47887 ZPE = 0.08771438

|   |           |           |           |
|---|-----------|-----------|-----------|
| U | -0.004464 | 0.094823  | 0.091446  |
| F | 1.714527  | 1.065675  | 0.611265  |
| F | -0.137957 | 0.632505  | -1.838529 |
| F | 1.359677  | -1.188996 | -0.597620 |
| F | 0.204720  | -0.730318 | 1.886901  |
| F | -1.300711 | -1.329733 | -0.421047 |
| F | -1.674125 | 0.860330  | 0.912052  |
| O | -0.186841 | 2.588914  | -0.058734 |
| O | 1.320801  | 3.543302  | -1.939859 |
| O | 3.567694  | 2.785672  | -0.643547 |
| H | 0.343954  | 3.023436  | -0.791799 |
| H | -1.082078 | 2.935826  | -0.075481 |
| H | 2.225207  | 3.356320  | -1.605848 |
| H | 1.216920  | 3.019717  | -2.738550 |
| H | 4.396351  | 2.403155  | -0.938204 |
| H | 3.170324  | 2.146370  | -0.037449 |

16

UF6-H2O-H2O-H2O-TSb E = -30638.058707888929 Dipole = 6.00106 ZPE = 0.08240399

|   |           |           |           |
|---|-----------|-----------|-----------|
| U | -0.894600 | -1.569809 | 0.482625  |
| F | 1.020666  | -0.929656 | 0.174149  |
| F | -1.100849 | -1.836673 | -1.472917 |
| F | 0.093950  | -3.300495 | 0.634220  |
| F | -0.690926 | -1.269750 | 2.429993  |
| F | -2.426456 | -2.792372 | 0.817718  |
| F | -3.001986 | -0.386921 | 0.533988  |
| O | -1.057735 | 0.549350  | 0.176950  |
| O | 0.412876  | 2.405825  | -0.688175 |
| O | 2.758426  | 1.216237  | -0.231021 |
| H | -0.484601 | 1.316609  | -0.181304 |
| H | -2.243030 | 0.416114  | 0.317046  |
| H | 1.344885  | 2.097429  | -0.598888 |
| H | 0.281346  | 2.646674  | -1.607860 |
| H | 3.559003  | 1.109464  | -0.747935 |
| H | 2.429033  | 0.327977  | -0.038589 |

16

UF5OH-H2O-H2O-HF E = -30638.099935908340 Dipole = 4.92164 ZPE = 0.08591264

|   |           |           |           |
|---|-----------|-----------|-----------|
| U | -0.832380 | 0.168583  | -0.914635 |
| F | 1.049564  | -0.239915 | -0.008928 |
| F | 1.917496  | 3.141314  | 1.741781  |
| F | -0.211229 | -0.662052 | -2.658635 |
| F | -1.463646 | -1.591625 | -0.291058 |
| F | -2.700295 | 0.554988  | -1.605900 |
| O | -0.244100 | 1.811602  | -1.347045 |
| O | -0.358824 | 3.308458  | 0.936330  |
| O | 2.903226  | 1.074983  | 1.177822  |
| H | 3.671358  | 1.120586  | 0.602659  |
| F | -1.338943 | 1.089211  | 1.000842  |
| H | -0.266907 | 3.278069  | -0.038009 |
| H | 0.603389  | 3.254998  | 1.329478  |
| H | 2.385761  | 2.235799  | 1.499058  |
| H | 2.234727  | 0.490538  | 0.738861  |
| H | -0.834854 | 2.408633  | 1.123906  |

## 6 Elementary step 2: UF<sub>5</sub>OH to UOF<sub>4</sub>

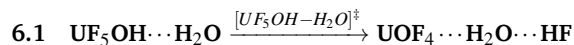

11

UF5OH-H2O E = -30460.989106307330 Dipole = 4.64971 ZPE = 0.04733355

|   |           |           |           |
|---|-----------|-----------|-----------|
| U | -1.165650 | -0.573939 | -0.232941 |
| F | 0.723087  | -1.018052 | -0.848110 |
| F | -1.521464 | 0.309359  | -1.996040 |
| F | -1.892996 | -2.269796 | -0.973039 |
| F | -0.769512 | -1.528458 | 1.488317  |
| F | -2.983801 | -0.056178 | 0.427040  |
| O | -0.392659 | 1.079622  | 0.487314  |
| H | 0.598942  | 1.267101  | 0.496310  |
| O | 2.186368  | 1.252872  | 0.319112  |
| H | 2.725557  | 1.179929  | 1.111194  |
| H | 2.355163  | 0.458688  | -0.201669 |

11

UF5OH-H2O-TS E = -30460.978853813249 Dipole = 6.12975 ZPE = 0.04665395

|   |           |           |           |
|---|-----------|-----------|-----------|
| U | -1.111581 | -0.484557 | -0.189386 |
| F | 0.992308  | -0.808182 | -0.762200 |
| F | -1.427870 | 0.374475  | -1.989022 |
| F | -1.695969 | -2.212896 | -0.954807 |
| F | -0.645111 | -1.443173 | 1.533839  |
| F | -2.992517 | -0.086340 | 0.437582  |
| O | -0.412843 | 1.087726  | 0.490801  |
| H | 0.982194  | 1.313394  | 0.459910  |
| O | 2.004000  | 1.111460  | 0.219160  |
| H | 2.505075  | 0.942931  | 1.026618  |
| H | 1.802315  | 0.205160  | -0.272495 |

11

UOF4-H2O-HF E = -30460.982090859481 Dipole = 5.85146 ZPE = 0.04790079

|   |           |           |           |
|---|-----------|-----------|-----------|
| U | -1.214095 | -0.460455 | -0.197753 |
| F | 1.075595  | -0.725737 | -0.813838 |
| F | -1.532271 | 0.320408  | -2.040092 |
| F | -1.676972 | -2.233688 | -0.927423 |
| F | -0.607785 | -1.375107 | 1.515557  |
| F | -3.123361 | -0.193505 | 0.432474  |
| O | -0.604974 | 1.108665  | 0.416131  |
| H | 1.351090  | 1.525779  | 0.571528  |
| O | 2.159006  | 1.070048  | 0.274221  |
| H | 2.664869  | 0.837640  | 1.059854  |
| H | 1.647207  | 0.025375  | -0.367955 |

6.2  $\text{UF}_5\text{OH}\cdots\text{HF} \xrightarrow{[\text{UF}_5\text{OH}\cdots\text{HF}]^\ddagger} \text{UOF}_4\cdots\text{HF}\cdots\text{HF}$

10

UF5OH-HF E = -30485.067699861014 Dipole = 1.15521 ZPE = 0.03485172

|   |           |           |          |
|---|-----------|-----------|----------|
| H | -0.600632 | -0.226744 | 0.507143 |
| O | -2.372159 | -0.137242 | 2.685227 |
| H | -1.646912 | -0.689099 | 2.326078 |
| F | -0.393819 | -0.979689 | 1.019547 |
| F | -1.855862 | 2.641734  | 2.853163 |
| U | -3.129621 | 1.486720  | 1.843845 |
| F | -1.701586 | 1.225803  | 0.393874 |
| F | -4.482267 | 1.648988  | 3.301151 |
| F | -4.378530 | 0.374862  | 0.757571 |
| F | -3.851993 | 3.108665  | 0.960528 |

10

UF5OH-HF-TS E = -30485.049889228958 Dipole = ZPE = 0.03099894

|   |           |           |           |
|---|-----------|-----------|-----------|
| H | 1.505061  | -0.795103 | -1.001375 |
| O | 0.073655  | -0.952835 | 0.935546  |
| H | 1.022265  | -1.511321 | 0.361686  |
| F | 1.816263  | -1.715269 | -0.399452 |
| F | 0.645456  | 1.739251  | 1.171462  |
| U | -0.685700 | 0.590779  | 0.212090  |
| F | 0.942989  | 0.152090  | -1.323025 |
| F | -2.052715 | 0.792958  | 1.670721  |
| F | -1.922122 | -0.504993 | -0.920032 |
| F | -1.345152 | 2.204444  | -0.707622 |

10

UOF4-HF-HF E = -30485.055098031884 Dipole = 2.24988 ZPE = 0.03530459

|   |           |           |           |
|---|-----------|-----------|-----------|
| H | -0.289039 | 0.073521  | 0.277664  |
| O | -1.940699 | -0.147988 | 2.278421  |
| H | -0.626013 | -0.983245 | 1.728774  |
| F | 0.077299  | -1.091796 | 1.086680  |
| F | -1.283205 | 2.491799  | 2.485419  |
| U | -2.620811 | 1.337656  | 1.512480  |
| F | -0.767395 | 0.868811  | -0.028645 |
| F | -4.099819 | 1.605875  | 2.859317  |
| F | -3.733964 | 0.222082  | 0.254066  |
| F | -3.193783 | 2.936177  | 0.517302  |

6.3  $\text{UF}_5\text{OH}\cdots\text{UF}_6 \xrightarrow{[\text{UF}_5\text{OH}-\text{UF}_6]^\ddagger} \text{U}_2\text{OF}_{10}\cdots\text{HF}$

15

UF5OH-UF6 E = -60793.067030528102 Dipole = 2.77804 ZPE = 0.03522433

|   |           |          |           |
|---|-----------|----------|-----------|
| U | 5.071680  | 3.229292 | 1.366290  |
| F | 5.778763  | 1.769369 | 2.500623  |
| F | 6.006115  | 2.453278 | -0.195560 |
| F | 3.465330  | 2.077304 | 0.946394  |
| F | 4.382065  | 4.681918 | 0.221495  |
| O | 0.724587  | 1.983775 | 0.171206  |
| F | 6.670992  | 4.325018 | 1.785030  |
| F | 4.140045  | 3.982158 | 2.937573  |
| H | 1.593389  | 1.670717 | 0.467755  |
| U | 0.260398  | 3.855025 | -0.346668 |
| F | -1.308331 | 3.834173 | 0.887319  |
| F | 1.459672  | 4.507629 | 1.126380  |
| F | 1.856702  | 3.889810 | -1.553496 |
| F | -0.188995 | 5.723552 | -0.856033 |
| F | -0.895864 | 3.178469 | -1.826159 |

15

UF5OH-UF6-TS E = -60793.037497033336 Dipole = 0.59794 ZPE = 0.03305340

|   |           |           |           |
|---|-----------|-----------|-----------|
| U | 1.742018  | -0.354004 | 0.988973  |
| F | 2.933418  | -1.901723 | 1.256753  |
| F | 2.669351  | 0.087663  | -0.689434 |
| F | 0.841781  | -2.248571 | -0.045225 |
| F | 0.951645  | 1.460207  | 1.043630  |
| O | -0.291355 | -0.359130 | -0.265279 |
| F | 3.146578  | 0.543191  | 2.070266  |
| F | 0.717147  | -0.838028 | 2.597287  |
| H | 0.046599  | -1.503850 | -0.346576 |
| U | -1.870639 | 0.691860  | -0.982330 |
| F | -2.190694 | 1.460763  | 0.825618  |
| F | -0.670468 | 2.214685  | -1.430341 |
| F | -1.547115 | -0.101571 | -2.780771 |
| F | -3.426430 | 1.700949  | -1.693377 |
| F | -3.052137 | -0.852641 | -0.549297 |

6.4  $\text{U}_2\text{OF}_{10} \xrightarrow{[\text{U}_2\text{OF}_{10}]^\ddagger} \text{UOF}_4\cdots\text{UF}_6$

13

U2OF10 E = -60692.480884608129 Dipole = 0.01430 ZPE = 0.02338850

|   |           |           |           |
|---|-----------|-----------|-----------|
| U | 1.070778  | 0.702706  | -0.966528 |
| F | 2.075084  | 0.580978  | 0.743371  |
| F | 2.729477  | 1.271853  | -1.900350 |
| F | 1.488023  | -1.198094 | -1.361058 |
| F | 0.061406  | 0.847820  | -2.671659 |
| O | 0.640057  | 2.650747  | -0.565304 |
| F | -0.592759 | 0.156925  | -0.027368 |
| U | 0.166871  | 4.594045  | -0.189909 |
| F | 0.158028  | 4.202869  | 1.757944  |
| F | 2.101527  | 5.035477  | -0.093157 |
| F | 0.180962  | 4.961603  | -2.142399 |
| F | -0.296180 | 6.489567  | 0.178065  |
| F | -1.761942 | 4.128739  | -0.292708 |

13

U2OF10-TS E = -60692.453857894776 Dipole = 2.72023 ZPE = 0.02346348

|   |           |           |           |
|---|-----------|-----------|-----------|
| U | 0.718891  | -1.909911 | 0.021642  |
| F | 1.957044  | -3.104009 | 1.082620  |
| F | 2.099769  | -1.251073 | -1.303459 |
| F | 0.304230  | -3.373154 | -1.228961 |
| F | -0.655304 | -0.199847 | -0.960270 |
| O | 0.951553  | -0.444425 | 1.033489  |
| F | -0.974532 | -2.373330 | 1.028653  |
| U | -0.649951 | 1.730531  | -0.018867 |
| F | -0.987249 | 1.283871  | 1.864337  |
| F | 1.270036  | 2.113484  | 0.144247  |
| F | -0.486605 | 2.341748  | -1.880290 |
| F | -0.955574 | 3.619496  | 0.491385  |
| F | -2.592309 | 1.566620  | -0.274526 |

13

UOF4-UF6 E = -60692.456621165198 Dipole = 4.72671 ZPE = 0.02294324

|   |           |           |           |
|---|-----------|-----------|-----------|
| U | 1.576227  | 0.089920  | -0.799449 |
| F | 2.558210  | -1.638879 | -0.394395 |
| F | 2.788355  | 0.859947  | -2.243565 |
| F | 0.575796  | -0.815655 | -2.232418 |
| F | 0.396494  | 2.284951  | -1.207105 |
| O | 2.381309  | 1.050182  | 0.443229  |
| F | -0.062044 | -0.151071 | 0.387385  |
| U | 0.314914  | 4.209550  | -0.423329 |
| F | 0.286497  | 3.482313  | 1.400626  |
| F | 2.276822  | 4.298464  | -0.389725 |
| F | 0.323964  | 4.922253  | -2.258214 |
| F | 0.208295  | 6.050414  | 0.298489  |
| F | -1.650001 | 4.112421  | -0.485277 |

## 7 Elementary step 3: UOF<sub>4</sub> to UF<sub>4</sub>(OH)<sub>2</sub>

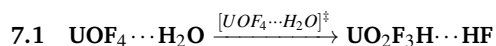

9

UOF4-H2O E = -30360.370565959769 Dipole = 4.85971 ZPE = 0.03506597

|   |           |           |           |
|---|-----------|-----------|-----------|
| U | 0.643526  | -0.467096 | -0.549439 |
| F | -0.884615 | -1.314758 | -1.626746 |
| F | 1.434556  | -0.344224 | 1.341269  |
| F | 1.778412  | -2.102669 | -0.899573 |
| F | -0.648585 | 1.006067  | -0.023217 |
| O | 1.594960  | 0.576799  | -1.634236 |
| H | -1.615761 | -1.989119 | 0.687789  |
| O | -0.702368 | -1.833950 | 0.952397  |
| H | -0.668755 | -1.597287 | 1.885876  |

9

UOF4-H2O-TS E = -30360.346901426405 Dipole = 2.66093 ZPE = 0.03117955

|   |           |           |           |
|---|-----------|-----------|-----------|
| U | 0.368331  | 0.314065  | -0.608089 |
| F | -0.950739 | -0.365869 | -1.984867 |
| F | 0.919686  | 0.271575  | 1.696738  |
| F | 1.583304  | -1.261720 | -0.908957 |
| F | -0.919261 | 1.802860  | -0.160490 |
| O | 1.488082  | 1.413068  | -1.417678 |
| H | -1.724980 | -0.868402 | 0.943933  |
| O | -0.772194 | -0.922049 | 0.820510  |
| H | 0.007769  | -0.383528 | 1.618901  |

9

UO2F3H-HF E = -30360.357745848592 Dipole = 2.91203 ZPE = 0.03292477

|   |           |           |           |
|---|-----------|-----------|-----------|
| U | 0.999645  | -0.310459 | 0.000324  |
| F | 0.248111  | -0.912278 | -1.795619 |
| F | 2.132423  | -0.073789 | 2.317009  |
| F | 2.355283  | -1.816141 | 0.589405  |
| F | -0.159000 | 1.330362  | 0.380398  |
| O | 2.309983  | 0.630158  | -0.687388 |
| H | -1.352793 | -1.189824 | 0.955829  |
| O | -0.404880 | -1.367406 | 0.914290  |
| H | 2.586216  | -0.873593 | 2.105330  |

## 7.2 UOF<sub>4</sub>...H<sub>2</sub>O...HF $\xrightarrow{[UOF_4...H_2O...HF]^\ddagger}$ UF<sub>4</sub>(OH)<sub>2</sub>...HF

11

UOF4-HF-H2O E = -30460.984679957695 Dipole = 3.10951 ZPE = 0.04834211

|   |           |           |           |
|---|-----------|-----------|-----------|
| U | 1.268395  | 0.635551  | -0.793919 |
| F | 0.812062  | -0.027061 | 1.172698  |
| F | 3.295755  | 0.542851  | -0.818749 |
| F | 1.223977  | -1.242492 | -1.352503 |
| F | 0.813062  | 1.156911  | -2.711457 |
| O | 1.226752  | 2.309732  | -0.265292 |
| H | -0.625827 | 0.087153  | 1.823691  |
| F | -1.562394 | 0.253978  | 1.820996  |
| H | -1.690573 | 1.184720  | -1.299005 |
| O | -1.174071 | 0.594415  | -0.743516 |
| H | -1.583638 | 0.535114  | 0.147506  |

11

UOF4-HF-H2O-TS E = -30460.961284151697 Dipole = 3.14649 ZPE = 0.04210179

|   |           |           |           |
|---|-----------|-----------|-----------|
| U | 0.944905  | -0.396689 | 0.031614  |
| F | 0.676481  | -0.971769 | 1.932774  |
| F | 2.908012  | -0.121215 | 0.360166  |
| F | 1.167270  | -2.307376 | -0.452427 |
| F | 1.174561  | 0.053471  | -1.908307 |
| O | 0.453892  | 1.389678  | 0.445046  |
| H | -0.623107 | 1.720822  | 0.374170  |
| F | -1.850414 | 1.697343  | 0.189892  |
| H | -1.831747 | -1.186272 | -0.605713 |
| O | -1.260008 | -0.484098 | -0.287264 |
| H | -1.759845 | 0.606108  | -0.079950 |

11

UF4OH2-HF-HF E = -30460.969619378302 Dipole = 2.65650 ZPE = 0.04584230

|   |           |           |           |
|---|-----------|-----------|-----------|
| U | 1.026307  | 0.705822  | -0.877053 |
| F | 0.742804  | 0.193245  | 1.036224  |
| F | 2.977250  | 0.960634  | -0.532725 |
| F | 1.272793  | -1.221387 | -1.319824 |
| F | 1.312639  | 1.121846  | -2.813313 |
| O | 0.651401  | 2.608022  | -0.465434 |
| H | -0.243079 | 3.007102  | -0.400036 |
| F | -2.029696 | 2.807580  | -0.614505 |
| H | -1.506181 | -0.229770 | -1.588010 |
| O | -1.030180 | 0.521388  | -1.219127 |
| H | -1.880137 | 1.907680  | -0.879306 |



7.3  $\text{UOF}_4 \cdots \text{HF} \cdots \text{H}_2\text{O} \cdots \text{HF} \xrightarrow{[\text{UOF}_4 \cdots \text{HF} \cdots \text{H}_2\text{O} \cdots \text{HF}]^\ddagger} \text{UF}_4(\text{OH})_2 \cdots \text{HF} \cdots \text{HF}$

13

UOF4-HF-H2O-HF E = -30561.569540591183 Dipole = 2.41344 ZPE = 0.06017701

|   |           |           |           |
|---|-----------|-----------|-----------|
| O | -1.012388 | 0.440292  | 0.178573  |
| H | -0.522177 | -0.367491 | 0.418631  |
| H | -1.095003 | 3.186666  | -0.601060 |
| H | -0.485345 | 1.052397  | -0.362520 |
| O | -2.528074 | -0.375673 | 2.427082  |
| H | -1.210923 | -1.524560 | 2.045286  |
| F | -0.468936 | -1.781424 | 1.526680  |
| F | -1.140473 | 1.955984  | 2.795640  |
| U | -2.674340 | 1.254997  | 1.685145  |
| F | -0.368294 | 2.766635  | -1.008707 |
| F | -4.051631 | 2.061155  | 2.927747  |
| F | -4.086655 | 0.630168  | 0.389565  |
| F | -2.509089 | 2.953524  | 0.583578  |

13

UOF4-HF-H2O-HF-TS E = -30561.547644365986 Dipole = 1.67853 ZPE = 0.05452205

|   |           |           |           |
|---|-----------|-----------|-----------|
| O | -0.998944 | 0.510983  | 0.521369  |
| H | -0.716985 | -0.639047 | 0.817442  |
| H | -1.211599 | 3.152167  | -0.725768 |
| H | -0.572245 | 0.988807  | -0.206458 |
| O | -2.447348 | -0.443692 | 2.483228  |
| H | -1.672789 | -1.161726 | 2.059873  |
| F | -0.764117 | -1.619952 | 1.367139  |
| F | -1.287792 | 2.052259  | 3.043417  |
| U | -2.625578 | 1.302209  | 1.758027  |
| F | -0.555484 | 2.660208  | -1.164961 |
| F | -4.119688 | 1.916781  | 2.947764  |
| F | -3.956711 | 0.682054  | 0.398290  |
| F | -2.485771 | 3.037349  | 0.713706  |

13

UF4OH2-HF-HF E = -30561.553683036913 Dipole = 1.68596 ZPE = 0.05765706

|   |           |           |           |
|---|-----------|-----------|-----------|
| O | -2.247091 | 2.609187  | 0.589965  |
| H | -1.489765 | 2.950615  | 0.072330  |
| H | 0.133210  | 1.616742  | -0.552419 |
| H | -0.256515 | -1.471959 | 0.520823  |
| O | -2.105955 | -0.824799 | 2.549712  |
| H | -1.654342 | -1.617717 | 2.195043  |
| F | -0.437350 | -2.287942 | 0.940331  |
| F | -0.854390 | 1.693555  | 2.841007  |
| U | -2.221033 | 0.910046  | 1.604599  |
| F | -0.602678 | 0.271643  | 0.369841  |
| F | -3.738320 | 1.511783  | 2.766511  |
| F | -3.465647 | 0.079485  | 0.273923  |
| F | 0.126994  | 2.523481  | -0.780285 |

## 8 Elementary step 4: dimerization of UF<sub>4</sub>(OH)<sub>2</sub>

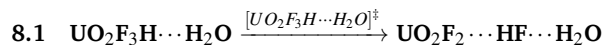

10

UO2F3H-H2O E = -30336.275185663613 Dipole = 4.50916 ZPE = 0.04632069

|   |           |           |          |
|---|-----------|-----------|----------|
| O | -1.515192 | 1.640920  | 0.312924 |
| O | -2.514117 | -0.069062 | 3.409729 |
| F | -0.531736 | 1.813139  | 2.861653 |
| U | -2.004082 | 0.859185  | 1.800991 |
| F | -3.897200 | 1.642607  | 1.688675 |
| F | -1.767012 | -1.091258 | 1.037198 |
| H | -2.610242 | -1.086936 | 3.463692 |
| O | -2.565189 | -2.599174 | 3.180035 |
| H | -2.243512 | -2.560490 | 2.265427 |
| H | -3.398518 | -3.077241 | 3.162958 |

10

UO2F3H-H2O-TS E = -30336.270564166593 Dipole = 5.94842 ZPE = 0.04463766

|   |           |           |           |
|---|-----------|-----------|-----------|
| O | 0.901432  | 1.974890  | -1.940607 |
| O | -0.442904 | 0.404474  | 1.002830  |
| F | 1.840576  | 1.918987  | 0.649854  |
| U | 0.243201  | 1.271021  | -0.480912 |
| F | -1.504582 | 2.346048  | -0.657899 |
| F | 0.345755  | -0.825009 | -1.225762 |
| H | -0.596128 | -0.881135 | 1.019933  |
| O | -0.604590 | -1.958277 | 0.672878  |
| H | -0.171139 | -1.745333 | -0.239593 |
| H | -0.011621 | -2.505665 | 1.199277  |

10

UO2F2-HF-H2O E = -30336.275529902432 Dipole = 6.49130 ZPE = 0.04666526

|   |           |           |          |
|---|-----------|-----------|----------|
| O | -1.341293 | 1.214168  | 0.304435 |
| O | -2.726769 | -0.148535 | 3.250460 |
| F | -0.463940 | 1.371884  | 2.918207 |
| U | -2.033320 | 0.629171  | 1.801338 |
| F | -3.741949 | 1.756954  | 1.547054 |
| F | -1.867917 | -1.694002 | 1.116563 |
| H | -2.946468 | -2.013393 | 3.493563 |
| O | -2.791652 | -2.829062 | 2.976182 |
| H | -2.234583 | -2.297810 | 1.876552 |
| H | -2.234119 | -3.412986 | 3.498927 |

8.2  $\text{UO}_2\text{F}_3\text{H}\cdots\text{HF}\cdots\text{H}_2\text{O} \xrightarrow{[\text{UO}_2\text{F}_3\text{H}\cdots\text{HF}\cdots\text{H}_2\text{O}]^\ddagger} \text{UF}_4(\text{OH})_2\cdots\text{H}_2\text{O}$

12

UO2F3H-HF-H2O E = -30436.881527516900 Dipole = 4.74304 ZPE = 0.05807114

|   |           |           |           |
|---|-----------|-----------|-----------|
| O | -1.755055 | 2.455576  | 0.463566  |
| H | -0.661896 | 2.803715  | -1.108501 |
| O | -1.641743 | -0.934655 | 2.142872  |
| H | -2.315367 | -1.624194 | 2.101185  |
| F | -0.329642 | 1.506518  | 2.605914  |
| U | -1.779752 | 0.880879  | 1.323256  |
| F | -0.022619 | 0.391066  | -0.250807 |
| F | -3.369436 | 1.317200  | 2.525682  |
| F | -2.981285 | 0.043736  | -0.108897 |
| O | -0.011864 | 2.310242  | -1.643565 |
| H | -0.391115 | 2.198599  | -2.520994 |
| H | 0.058693  | 1.172049  | -0.923953 |

12

UO2F3H-HF-H2O-TS E = -30436.877641888681 Dipole = 4.73482 ZPE = 0.05660904

|   |           |           |           |
|---|-----------|-----------|-----------|
| O | -0.520577 | 1.352123  | -0.117528 |
| H | 0.366337  | 1.586474  | -1.150265 |
| O | -0.245576 | -2.026191 | 1.717169  |
| H | -0.910811 | -2.722905 | 1.766547  |
| F | 0.900704  | 0.525760  | 2.112706  |
| U | -0.453816 | -0.248424 | 0.818738  |
| F | 1.204134  | -0.638370 | -0.602274 |
| F | -2.048824 | 0.187117  | 2.003642  |
| F | -1.689626 | -1.155940 | -0.523983 |
| O | 1.179987  | 1.391642  | -1.837800 |
| H | 0.840030  | 1.316471  | -2.737100 |
| H | 1.378037  | 0.432242  | -1.449850 |

12

UF4(OH)2-H2O E = -30436.877641888681 Dipole = 4.73482 ZPE = 0.05660904

|   |           |           |           |
|---|-----------|-----------|-----------|
| O | -0.520577 | 1.352123  | -0.117528 |
| H | 0.366337  | 1.586474  | -1.150265 |
| O | -0.245576 | -2.026191 | 1.717169  |
| H | -0.910811 | -2.722905 | 1.766547  |
| F | 0.900704  | 0.525760  | 2.112706  |
| U | -0.453816 | -0.248424 | 0.818738  |
| F | 1.204134  | -0.638370 | -0.602274 |
| F | -2.048824 | 0.187117  | 2.003642  |
| F | -1.689626 | -1.155940 | -0.523983 |
| O | 1.179987  | 1.391642  | -1.837800 |
| H | 0.840030  | 1.316471  | -2.737100 |
| H | 1.378037  | 0.432242  | -1.449850 |

8.3  $\text{UF}_4(\text{OH})_2 \cdots \text{UF}_4(\text{OH})_2 \xrightarrow{[\text{UF}_4(\text{OH})_2 \cdots \text{UF}_4(\text{OH})_2]^\ddagger} \text{U}_2\text{O}_4\text{F}_7\text{H}_3 \cdots \text{HF}$

18

UF4(OH)2-UF4(OH)2 E = -60720.778809611264 Dipole = 0.05373 ZPE = 0.06637691

|   |           |           |           |
|---|-----------|-----------|-----------|
| O | -2.115789 | 2.395600  | 0.400382  |
| H | -1.469631 | 3.117285  | 0.219521  |
| O | -1.941326 | -0.930579 | 2.561527  |
| H | -2.544229 | -1.675940 | 2.662577  |
| F | -1.128289 | 1.770124  | 2.939266  |
| U | -2.051735 | 0.753732  | 1.483332  |
| F | -0.173663 | 0.386819  | 0.670778  |
| F | -3.869520 | 1.116374  | 2.262851  |
| F | -2.934842 | -0.298801 | 0.022800  |
| O | 2.182381  | 5.800722  | -0.131287 |
| H | 2.647335  | 6.455499  | -0.664524 |
| O | 1.580833  | 1.901593  | -0.576732 |
| H | 1.017042  | 1.240678  | -0.111797 |
| F | 3.886505  | 3.592974  | -0.602905 |
| U | 1.905013  | 3.829638  | -0.356025 |
| F | 1.736205  | 4.130547  | -2.331306 |
| F | 2.033461  | 3.568023  | 1.623860  |
| F | -0.145539 | 4.064572  | -0.108560 |

18

UF4(OH)2-UF4(OH)2-TS E = -60720.752833734041 Dipole = 2.37884 ZPE = 0.06476997

|   |           |           |           |
|---|-----------|-----------|-----------|
| O | -0.554837 | 0.187007  | 0.220521  |
| H | -0.706240 | 1.353448  | 0.103531  |
| O | -2.365701 | -3.063673 | 1.568388  |
| H | -3.055530 | -3.617228 | 1.184118  |
| F | -0.756818 | -1.064861 | 2.730537  |
| U | -1.498863 | -1.387796 | 0.897909  |
| F | 0.240165  | -2.415845 | 0.374889  |
| F | -3.126453 | -0.276363 | 1.308405  |
| F | -2.265536 | -1.795642 | -0.913472 |
| O | 1.838128  | 3.169250  | -1.267490 |
| H | 1.148488  | 3.822578  | -1.087647 |
| O | 1.891019  | -0.687486 | -0.610165 |
| H | 1.374695  | -1.455319 | -0.256529 |
| F | 3.502863  | 1.176921  | -1.613983 |
| U | 1.654270  | 1.230863  | -0.850708 |
| F | 0.748400  | 0.907212  | -2.600343 |
| F | 2.258022  | 1.540787  | 1.026309  |
| F | -0.326070 | 2.376145  | -0.214270 |

18

U2O4F7H3-HF E = -60720.779537985160 Dipole = 3.16220 ZPE = 0.06689956

|   |           |           |           |
|---|-----------|-----------|-----------|
| O | -0.078647 | 2.003567  | 0.572989  |
| H | -2.298760 | 4.312958  | 0.795260  |
| O | -3.219966 | 0.173562  | 2.092790  |
| H | -3.772484 | -0.544282 | 1.762150  |
| F | -1.055699 | 1.641419  | 3.156785  |
| U | -1.609916 | 1.071174  | 1.318573  |
| F | -0.554406 | -0.639270 | 1.462870  |
| F | -2.683880 | 2.868609  | 1.121396  |
| F | -2.230285 | 0.504556  | -0.503330 |
| O | 0.626192  | 4.742677  | 0.342096  |
| H | -0.329803 | 5.006294  | 0.424056  |
| O | 2.441674  | 1.439323  | -0.858069 |
| H | 3.269767  | 1.019340  | -0.597739 |
| F | 3.070269  | 4.213472  | -1.028275 |
| U | 1.553573  | 3.133149  | -0.269661 |
| F | 0.519897  | 3.186010  | -1.983218 |
| F | 2.556357  | 2.974377  | 1.458874  |
| F | -1.912282 | 5.150605  | 0.549301  |

## 9 Additional isolated species

8

UF5OH E = -30384.479964320766 Dipole = 2.65581 ZPE = 0.02156594

|   |           |           |           |
|---|-----------|-----------|-----------|
| U | -0.045751 | 0.033464  | 0.087695  |
| F | -1.737442 | -0.590552 | -0.755663 |
| O | 1.653586  | 0.658521  | 0.944125  |
| F | -1.050215 | 1.531950  | 0.941511  |
| F | 0.939885  | -1.453961 | -0.808825 |
| F | -0.412607 | -1.125757 | 1.667498  |
| F | 0.356952  | 1.198407  | -1.484495 |
| H | 2.459590  | 1.107929  | 0.669154  |

6

UOF4a E = -30283.862190650711 Dipole = 0.30551 ZPE = 0.01031687

|   |           |           |           |
|---|-----------|-----------|-----------|
| U | -1.299506 | -0.021546 | -0.066351 |
| F | 0.396007  | 0.951072  | -0.014463 |
| O | -2.817890 | -0.891759 | -0.112344 |
| F | -2.232341 | 1.784625  | -0.122964 |
| F | -0.652368 | -0.885125 | -1.790099 |
| F | -0.785253 | -0.836976 | 1.724341  |

6

UOF4e E = -30283.862190506432 Dipole = 0.31209 ZPE = 0.01031745

|   |           |           |           |
|---|-----------|-----------|-----------|
| U | -1.298888 | -0.021165 | -0.066011 |
| F | 0.396798  | 0.951358  | -0.013619 |
| O | -2.817290 | -0.891343 | -0.111886 |
| F | -2.232945 | 1.784245  | -0.124296 |
| F | -0.653420 | -0.884882 | -1.790181 |
| F | -0.785605 | -0.837923 | 1.724113  |

7

UO2F3H E = -30259.762802825077 Dipole = 2.60576 ZPE = 0.02053645

|   |           |           |          |
|---|-----------|-----------|----------|
| O | -1.423707 | 1.639097  | 0.345794 |
| O | -2.956022 | -0.117319 | 3.258621 |
| F | -0.534735 | 1.228001  | 2.947041 |
| U | -2.111939 | 0.790905  | 1.716253 |
| F | -3.832047 | 1.885733  | 1.581064 |
| F | -1.851827 | -1.055299 | 0.870631 |
| H | -2.614505 | -0.810756 | 3.836505 |

5

UO2F2 E = -30159.151037568681 Dipole = 4.32494 ZPE = 0.00926553

|   |           |           |           |
|---|-----------|-----------|-----------|
| U | 0.004539  | -0.021874 | -0.019828 |
| O | 1.646500  | 0.392481  | 0.428631  |
| O | -1.605348 | -0.208243 | -0.684984 |
| F | -0.704217 | 0.290174  | 1.879249  |
| F | 0.479336  | -1.990739 | -0.342178 |

9

UF4(OH)2 E = -30360.379413667819 Dipole = 0.01762 ZPE = 0.03191386

|   |           |           |          |
|---|-----------|-----------|----------|
| O | -2.134953 | 2.530841  | 0.584321 |
| H | -1.473510 | 3.199136  | 0.375627 |
| O | -1.927246 | -1.052319 | 2.397350 |
| H | -2.590613 | -1.715528 | 2.615914 |
| F | -0.798187 | 1.540867  | 2.857093 |
| U | -2.030887 | 0.739130  | 1.490522 |
| F | -0.418602 | 0.304300  | 0.376393 |
| F | -3.642984 | 1.172761  | 2.605580 |
| F | -3.263938 | -0.061208 | 0.123520 |

## Part III

### Supplementary figures

This section collects visualizations of the molecular species optimized using the PBE0 functional and a mixed triple- $\zeta$  basis set, as described in the main text. For reference, level diagrams are also provided as constructed using an alternate double hybrid density functional method, DSD-BLYP.

#### 10 Isolated and pre-reactive species

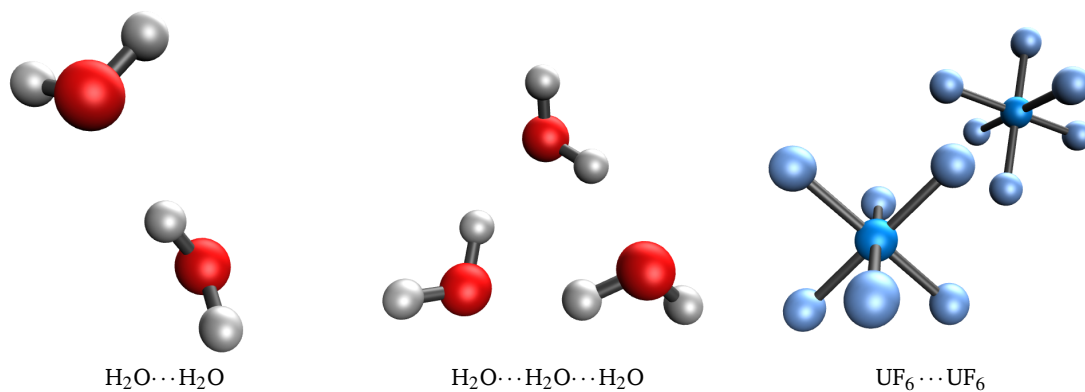

**Figure 1** Geometries of pre-reactive species

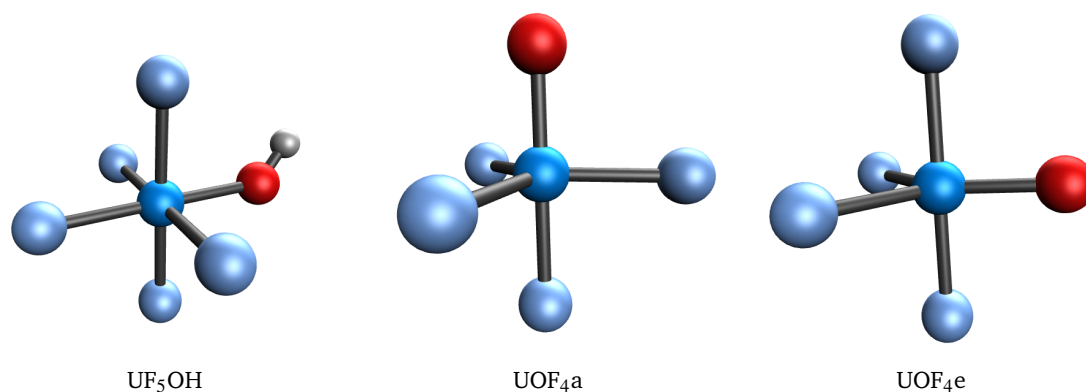

**Figure 2** Geometries of early isolated species

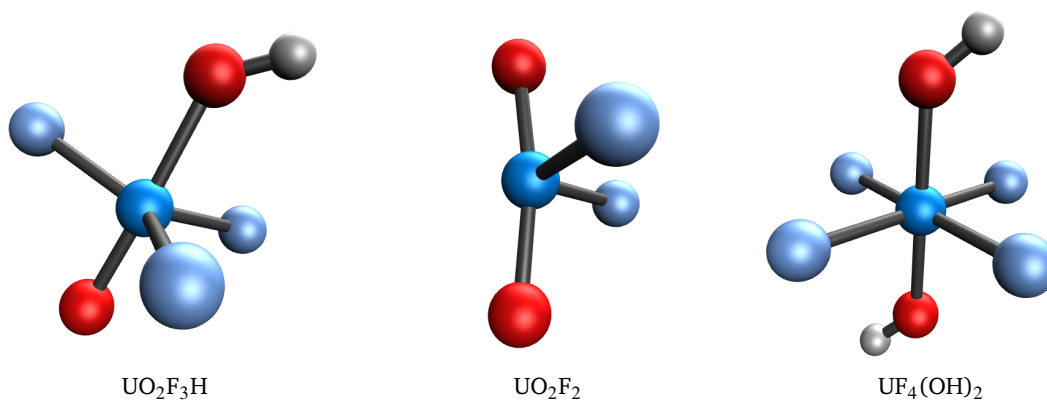

**Figure 3** Geometries of late isolated species

## 11 Elementary step 1, from $\text{UF}_6$ to $\text{UF}_5\text{OH}$ : DSD-BLYP level diagrams and PBE0 geometrical structures

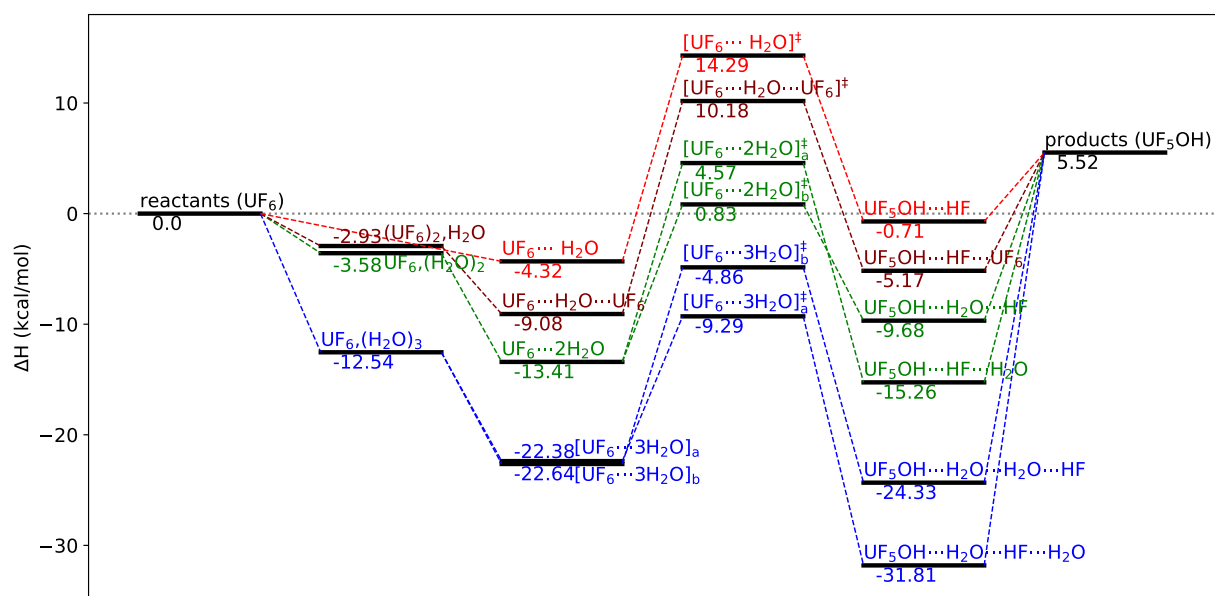

**Figure 4** DSD-BLYP energy level diagram for possible elementary steps connecting  $\text{UF}_6$  and  $\text{UF}_5\text{OH}$ .

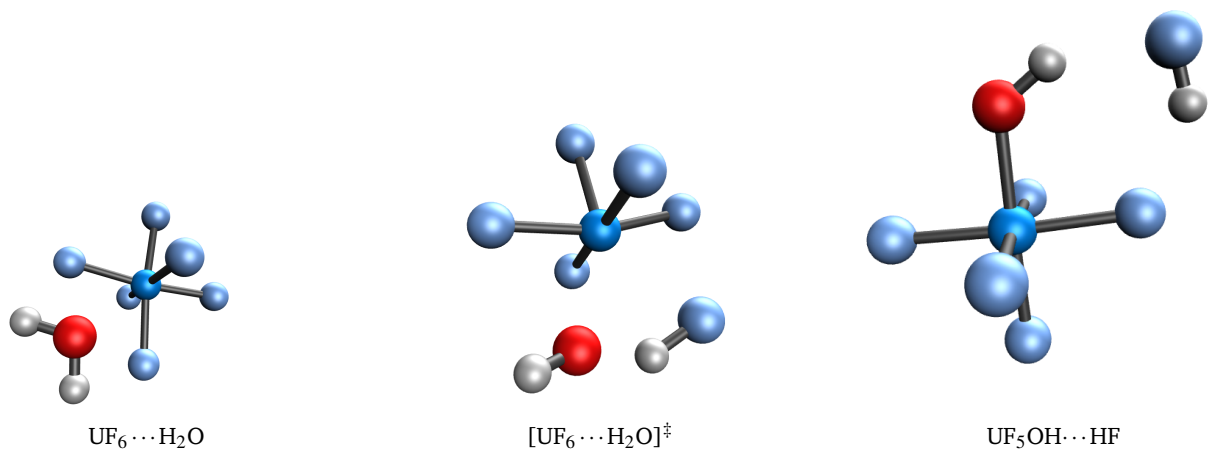

**Figure 5**  $\text{UF}_6 \cdots \text{H}_2\text{O} \xrightarrow{[\text{UF}_6-\text{H}_2\text{O}]^\ddagger} \text{UF}_5\text{OH} \cdots \text{HF}$ ; visualizations of PBE0-level stationary points

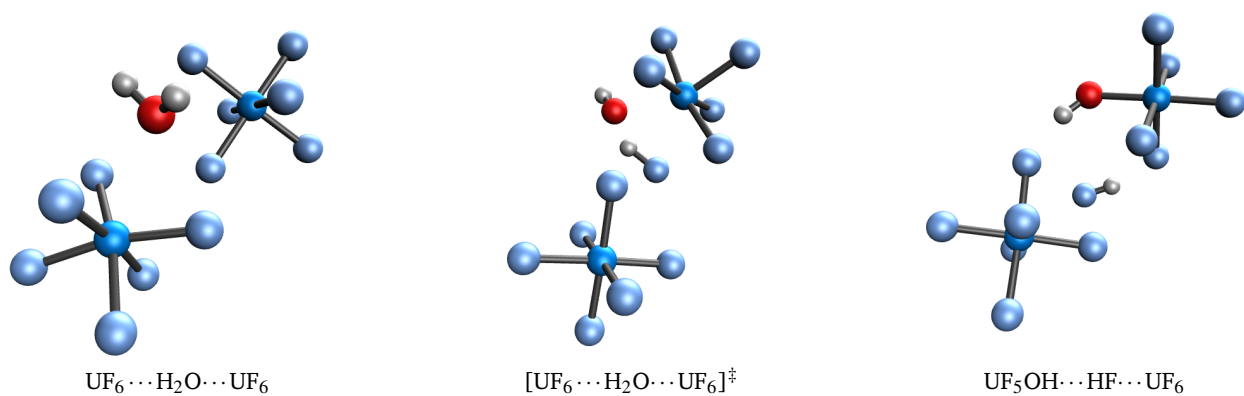

**Figure 6**  $\text{UF}_6 \cdots \text{H}_2\text{O} \cdots \text{UF}_6 \xrightarrow{[\text{UF}_6-\text{H}_2\text{O}-\text{UF}_6]^\ddagger} \text{UF}_5\text{OH} \cdots \text{HF} \cdots \text{UF}_6$ ; visualizations of PBE0-level stationary points.

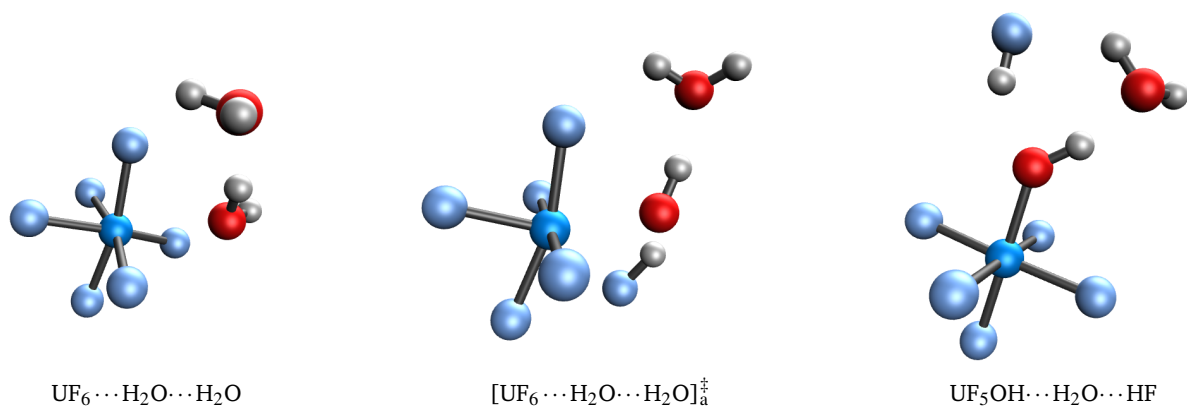

**Figure 7**  $\text{UF}_6 \cdots \text{H}_2\text{O} \cdots \text{H}_2\text{O} \xrightarrow{[\text{UF}_6-\text{H}_2\text{O}-\text{H}_2\text{O}]^\ddagger_a} \text{UF}_5\text{OH} \cdots \text{H}_2\text{O} \cdots \text{HF}$ ; visualizations of the PBE0-level stationary points



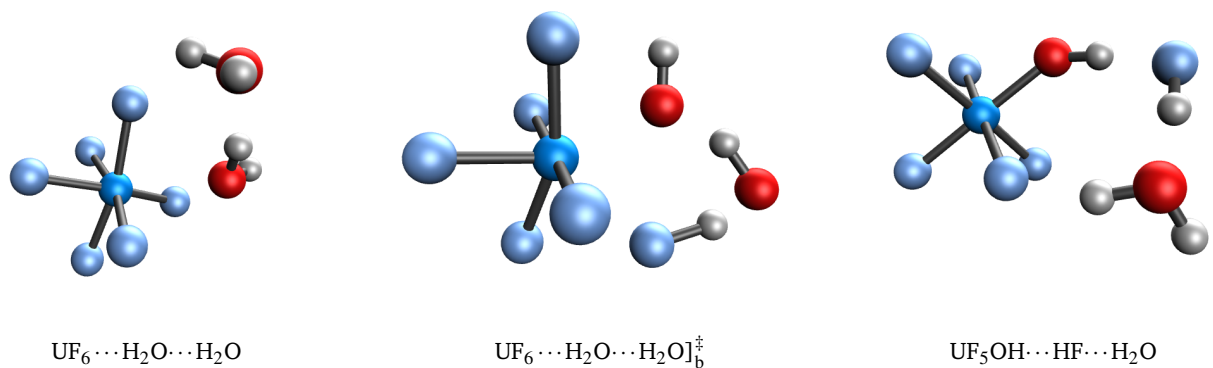

**Figure 8**  $\text{UF}_6 \cdots \text{H}_2\text{O} \cdots \text{H}_2\text{O} \xrightarrow{[\text{UF}_6-\text{H}_2\text{O}-\text{H}_2\text{O}]_b^\ddagger} \text{UF}_5\text{OH} \cdots \text{HF} \cdots \text{H}_2\text{O}$ ; visualizations of the PBE0-level stationary points

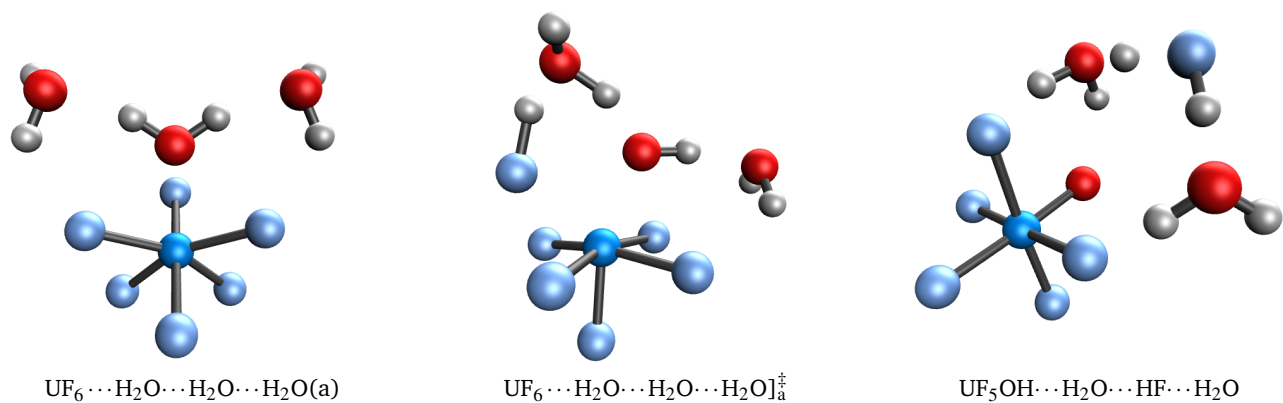

**Figure 9**  $\text{UF}_6 \cdots \text{H}_2\text{O}(\text{a}) \cdots \text{H}_2\text{O} \cdots \text{H}_2\text{O} \xrightarrow{[\text{UF}_6-\text{H}_2\text{O}-\text{H}_2\text{O}-\text{H}_2\text{O}]_a^\ddagger} \text{UF}_5\text{OH} \cdots \text{H}_2\text{O} \cdots \text{HF} \cdots \text{H}_2\text{O}$ ; visualizations of the PBE0-level stationary points

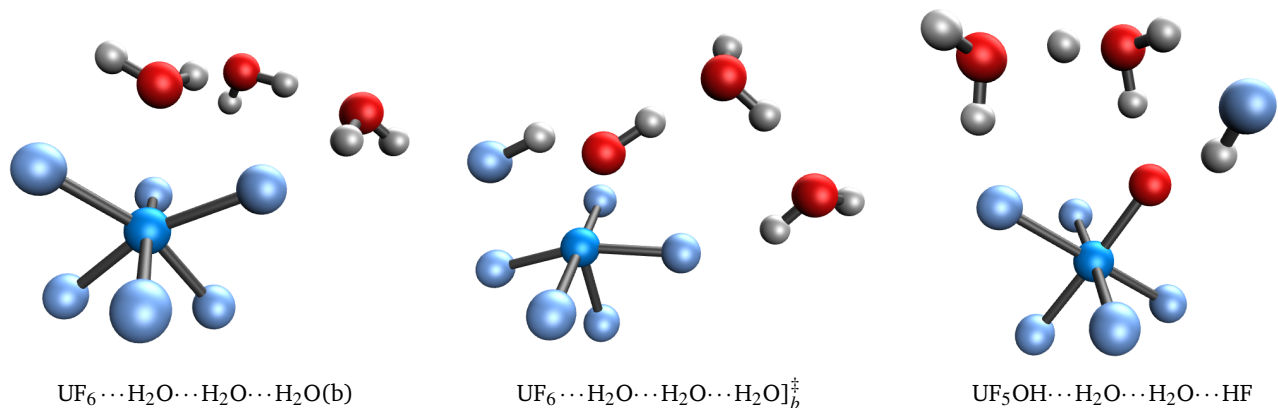

**Figure 10**  $\text{UF}_6 \cdots \text{H}_2\text{O} \cdots \text{H}_2\text{O} \cdots \text{H}_2\text{O}(\text{b}) \xrightarrow{[\text{UF}_6-\text{H}_2\text{O}-\text{H}_2\text{O}-\text{H}_2\text{O}]_b^\ddagger} \text{UF}_5\text{OH} \cdots \text{H}_2\text{O} \cdots \text{H}_2\text{O} \cdots \text{HF}$ ; visualizations of the PBE0-level stationary points

## 12 Elementary step 2, from $\text{UF}_5\text{OH}$ to $\text{UOF}_4$ : DSD-BLYP level diagrams and PBE0 geometrical structures

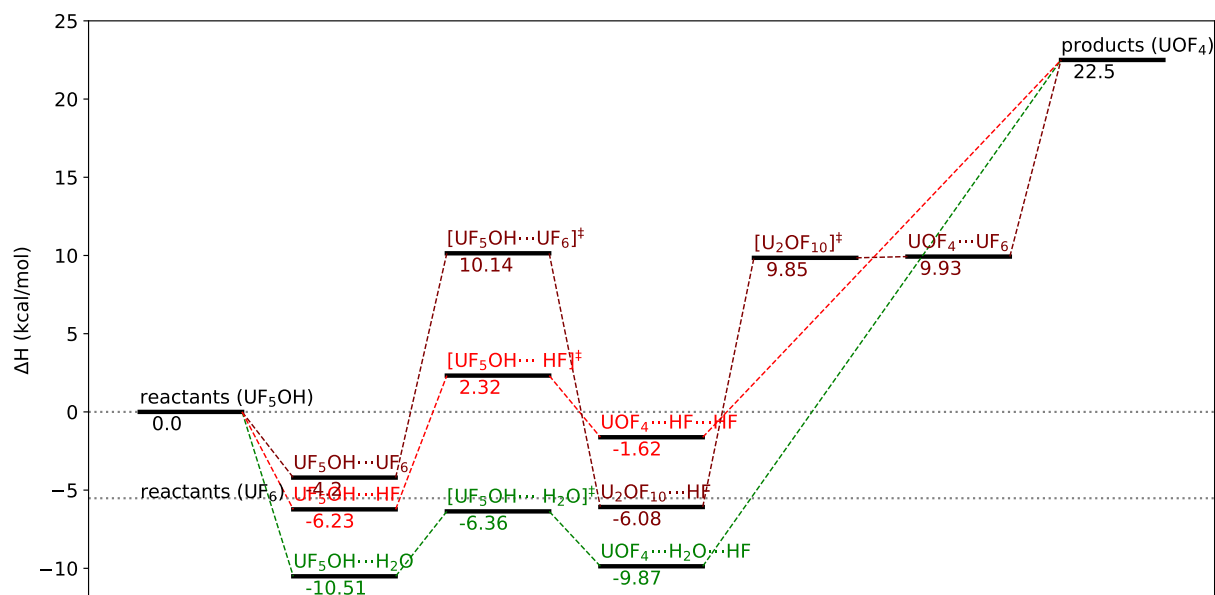

Figure 11 DSD-BLYP level diagram for elementary steps linking  $\text{UF}_5\text{OH}$  and  $\text{UOF}_4$

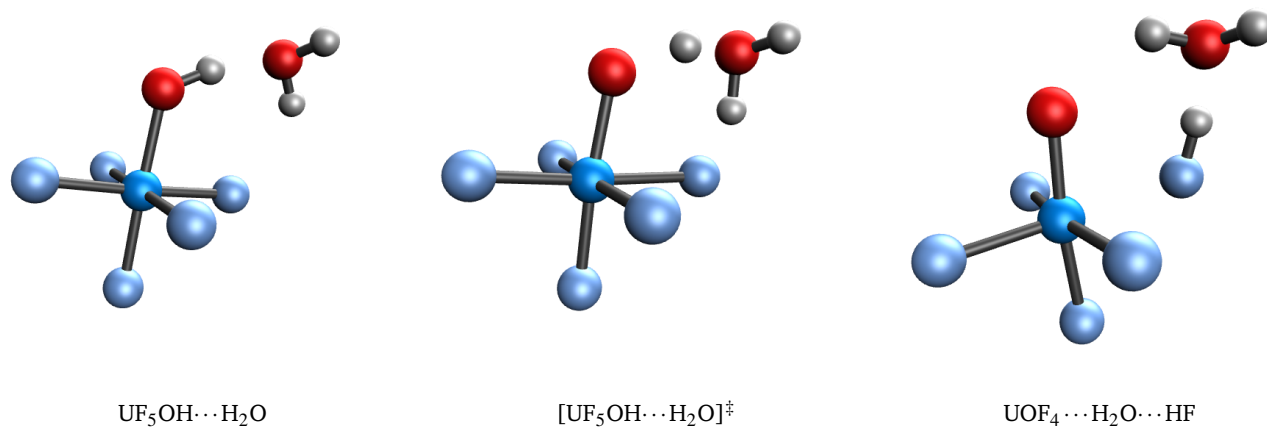

Figure 12  $\text{UF}_5\text{OH}\cdots\text{H}_2\text{O} \xrightarrow{[\text{UF}_5\text{OH}-\text{H}_2\text{O}]^\ddagger} \text{UOF}_4\cdots\text{H}_2\text{O}\cdots\text{HF}$ ; visualizations of the PBE0-level stationary points

### 13 Elementary step 3, from $\text{UOF}_4$ to $\text{UF}_4(\text{OH})_2$ : DSD-BLYP level diagrams and PBE0 geometrical structures

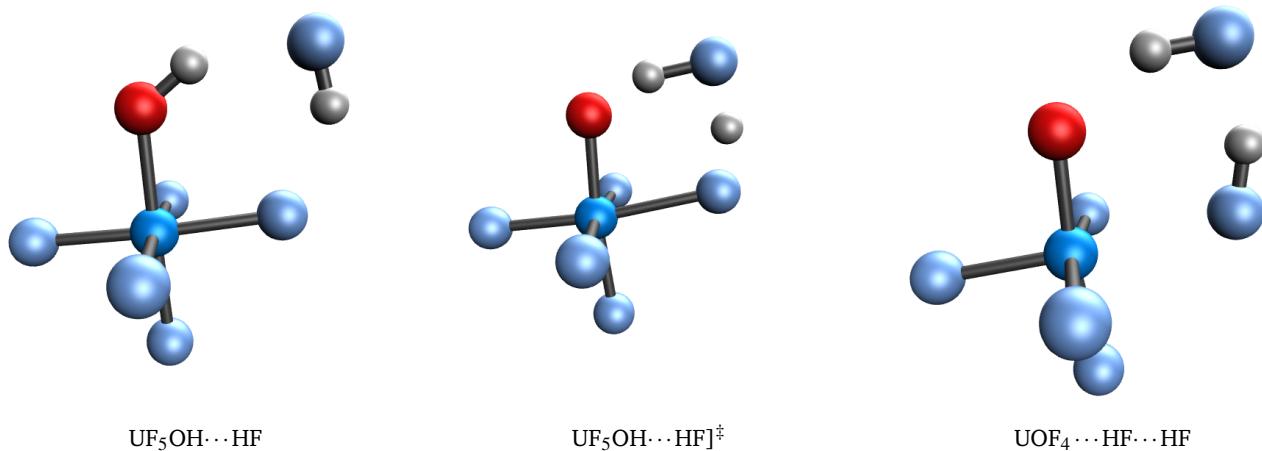

**Figure 13**  $\text{UF}_5\text{OH}\cdots\text{HF} \xrightarrow{[\text{UF}_5\text{OH}\cdots\text{HF}]^\ddagger} \text{UOF}_4\cdots\text{HF}\cdots\text{HF}$ ; visualizations of the PBE0-level stationary points

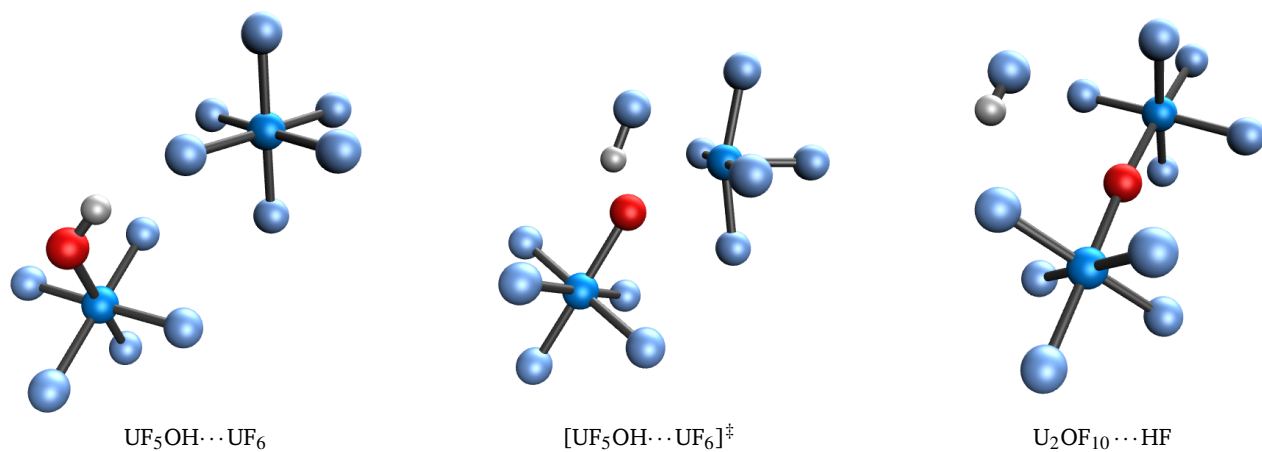

**Figure 14**  $\text{UF}_5\text{OH}\cdots\text{UF}_6 \xrightarrow{[\text{UF}_5\text{OH}\cdots\text{UF}_6]^\ddagger} \text{U}_2\text{OF}_{10}\cdots\text{HF}$ ; visualizations of the PBE0-level stationary points

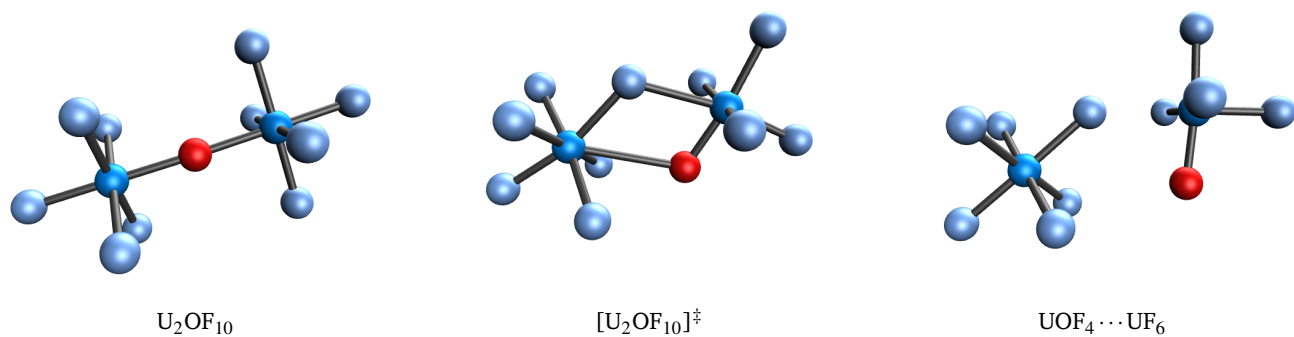

**Figure 15**  $\text{U}_2\text{OF}_{10} \xrightarrow{[\text{U}_2\text{OF}_{10}]^\ddagger} \text{UOF}_4\cdots\text{UF}_6$ ; visualization of the PBE0-level stationary points

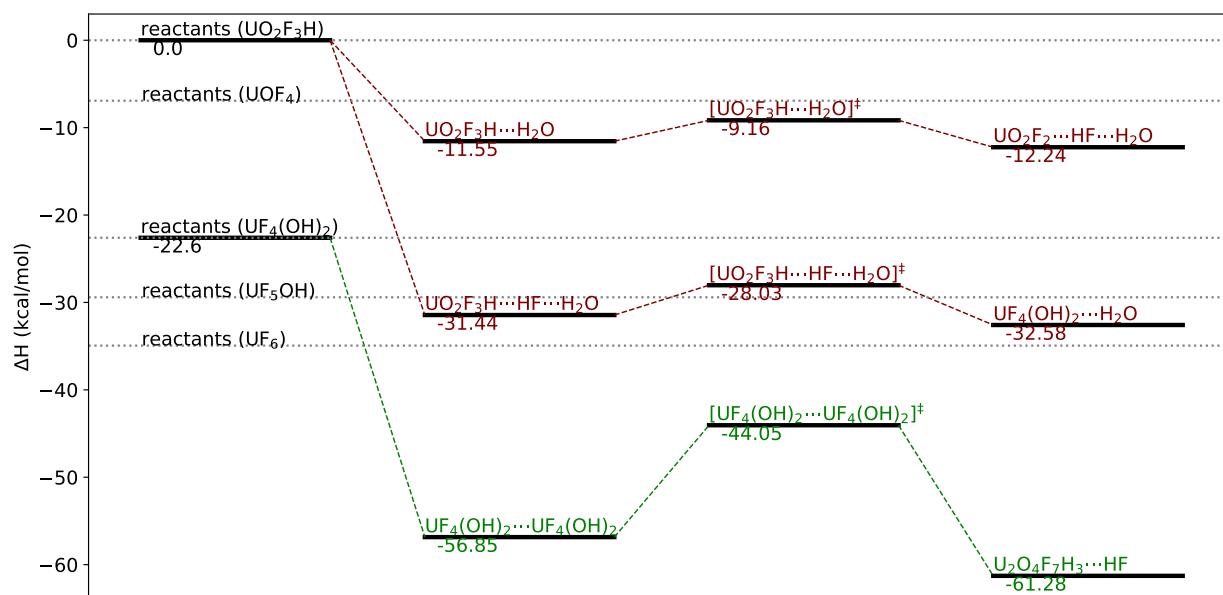

Figure 16 DSD-BLYP level diagram for elementary steps linking UOF<sub>4</sub> and UF<sub>4</sub>(OH)<sub>2</sub>

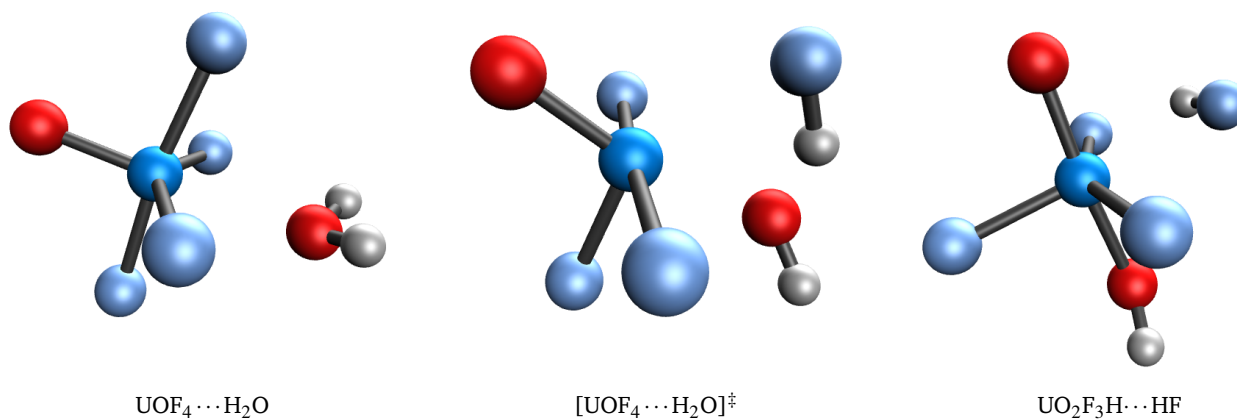

Figure 17  $\text{UOF}_4 \cdots \text{H}_2\text{O} \xrightarrow{[\text{UOF}_4 \cdots \text{H}_2\text{O}]^\ddagger} \text{UO}_2\text{F}_3\text{H} \cdots \text{HF}$ ; visualizations of the PBE0-level stationary points

## 14 Elementary step 4, dimerization of UF<sub>4</sub>(OH)<sub>2</sub>: DSD-BLYP level diagrams and PBE0 geometrical structures

### Part IV

### Supplementary files

Optimized Cartesian coordinates and computed harmonic vibrational frequencies are provided in the accompanying folder `PBE0geoms_freqs`.

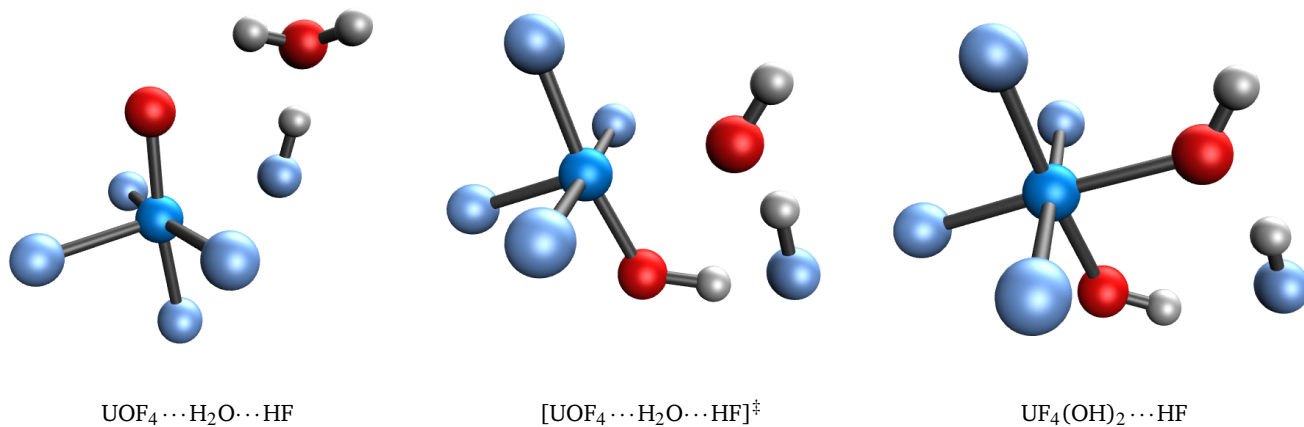

**Figure 18**  $\text{UOF}_4 \cdots \text{H}_2\text{O} \cdots \text{HF} \xrightarrow{[\text{UOF}_4 \cdots \text{H}_2\text{O} \cdots \text{HF}]^\ddagger} \text{UF}_4(\text{OH})_2 \cdots \text{HF}$ ; visualizations of the PBE0-level stationary points

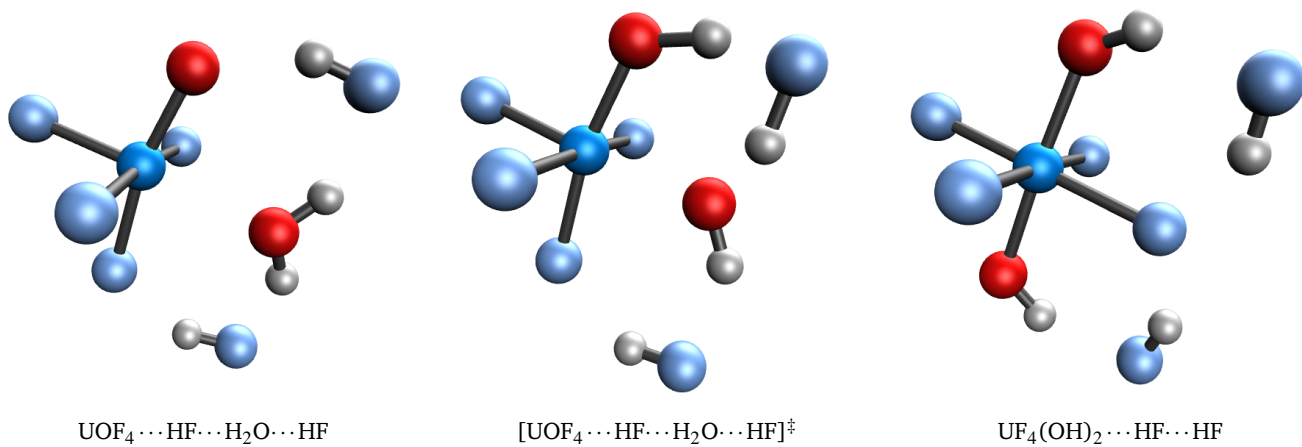

**Figure 19**  $\text{UOF}_4 \cdots \text{HF} \cdots \text{H}_2\text{O} \cdots \text{HF} \xrightarrow{[\text{UOF}_4 \cdots \text{HF} \cdots \text{H}_2\text{O} \cdots \text{HF}]^\ddagger} \text{UF}_4(\text{OH})_2 \cdots \text{HF} \cdots \text{HF}$ ; visualizations of the PBE0-level stationary points

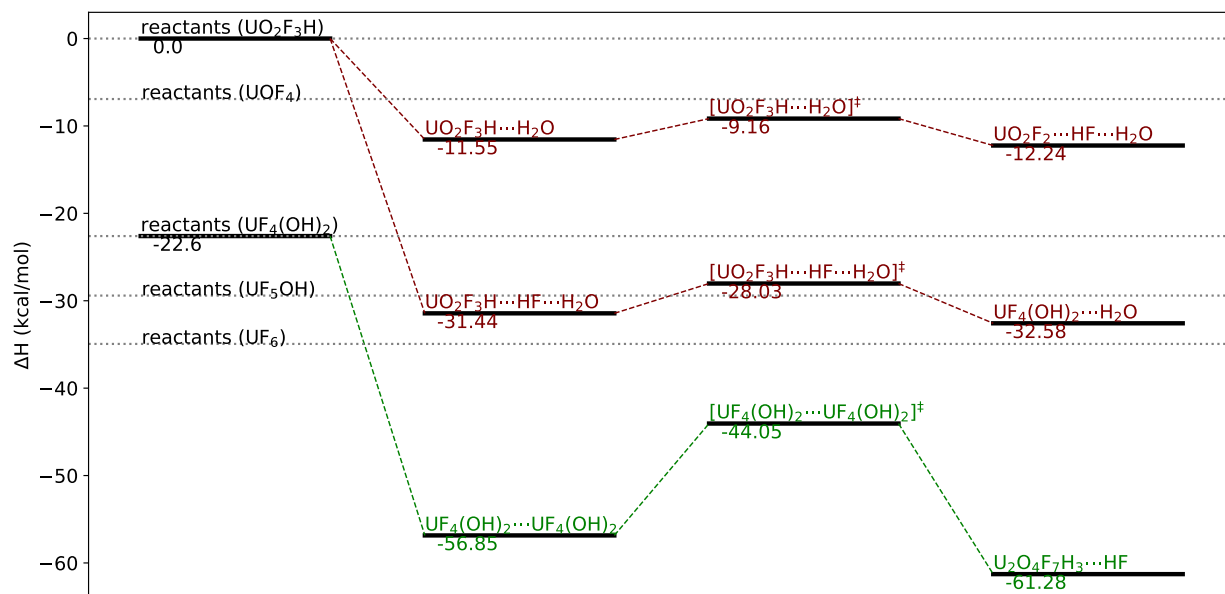

tabular

**Figure 20** DSD-BLYP energy level diagram for possible elementary steps connecting  $\text{UF}_4(\text{OH})_2$ ,  $\text{UO}_2\text{F}_2$ , and the  $\text{UF}_4(\text{OH})_2$  dimer.

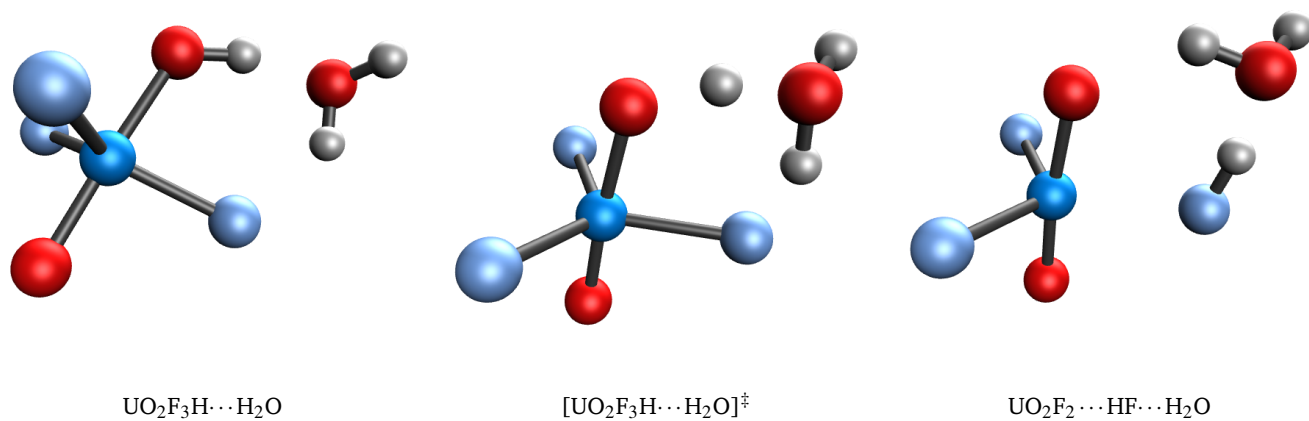

**Figure 21**  $\text{UO}_2\text{F}_3\text{H}\cdots\text{H}_2\text{O} \xrightarrow{[\text{UO}_2\text{F}_3\text{H}\cdots\text{H}_2\text{O}]^\ddagger} \text{UO}_2\text{F}_2\cdots\text{HF}\cdots\text{H}_2\text{O}$ ; visualizations of the PBE0-level stationary points

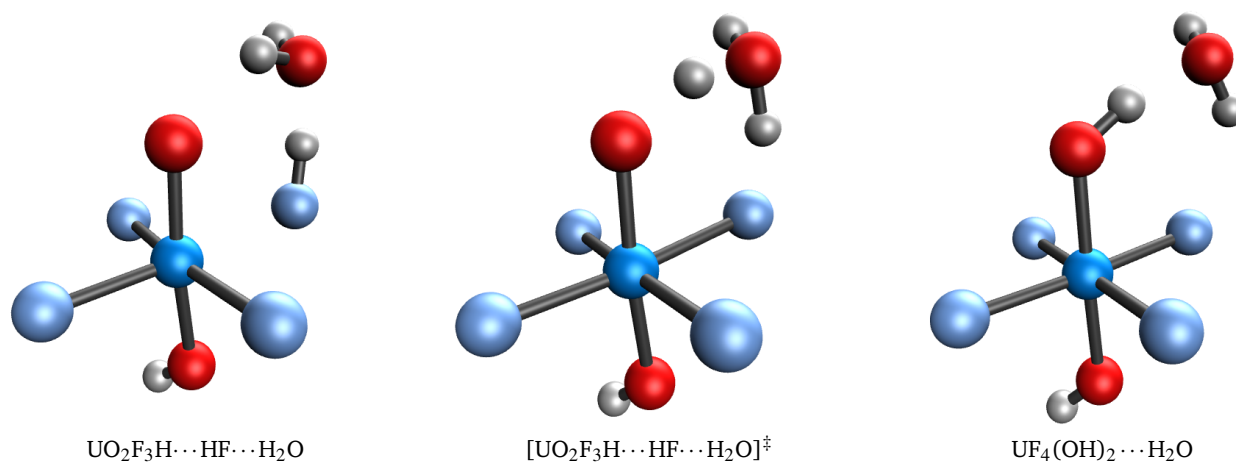

**Figure 22**  $\text{UO}_2\text{F}_3\text{H}\cdots\text{HF}\cdots\text{H}_2\text{O} \xrightarrow{[\text{UO}_2\text{F}_3\text{H}\cdots\text{HF}\cdots\text{H}_2\text{O}]^\ddagger} \text{UF}_4(\text{OH})_2\cdots\text{H}_2\text{O}$ ; visualizations of the PBE0-level stationary points

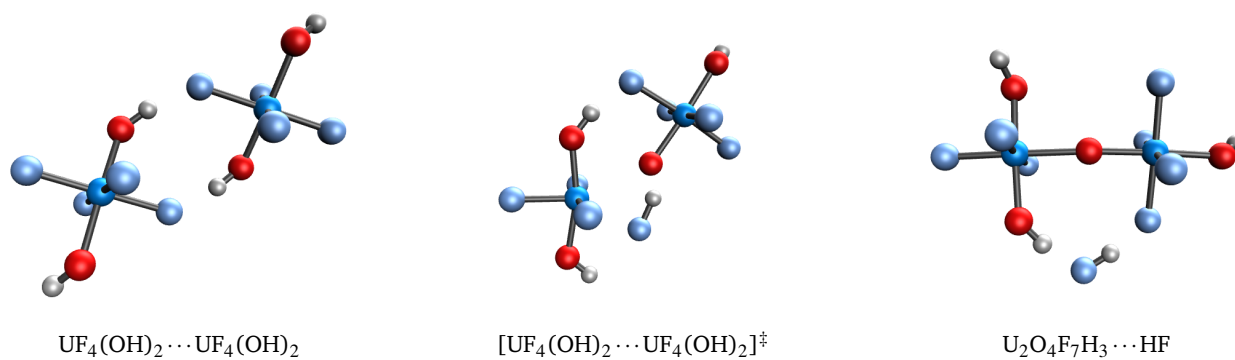

**Figure 23**  $\text{UF}_4(\text{OH})_2\cdots\text{UF}_4(\text{OH})_2 \xrightarrow{[\text{UF}_4(\text{OH})_2\cdots\text{UF}_4(\text{OH})_2]^\ddagger} \text{U}_2\text{O}_4\text{F}_7\text{H}_3\cdots\text{HF}$ ; visualizations of the PBE0-level stationary points

## Part V

# References

### 15 Full form of references abbreviated in the main document

<sup>83</sup> DIRAC, a relativistic ab initio electronic structure program, Release DIRAC18 (2018), written by T. Saue, L. Visscher, H. J. Aa. Jensen, and R. Bast, with contributions from V. Bakken, K. G. Dyall, S. Dubillard, U. Ekström, E. Eliav, T. Enevoldsen, E. Faßhauer, T. Fleig, O. Fossgaard, A. S. P. Gomes, E. D. Hedegård, T. Helgaker, J. Henriksson, M. Iliaš, Ch. R. Jacob, S. Knecht, S. Komorovský, O. Kullie, J. K. Lærdahl, C. V. Larsen, Y. S. Lee, H. S. Nataraj, M. K. Nayak, P. Norman, G. Olejniczak, J. Olsen, J. M. H. Olsen, Y. C. Park, J. K. Pedersen, M. Pernpointner, R. di Remigio, K. Ruud, P. Sałek, B. Schimmel, A. Shee, J. Sikkema, A. J. Thorvaldsen, J. Thyssen, J. van Stralen, S. Villaume, O. Visser, T. Winther, and S. Yamamoto (available at <https://doi.org/10.5281/zenodo.2253986>, see also <http://www.diracprogram.org>)

<sup>84</sup> Trond Saue, Radovan Bast, André Severo Pereira Gomes, Hans Jørgen Aa. Jensen, Lucas Visscher, Ignacio Agustín Aucar, Roberto Di Remigio, Kenneth G. Dyall, Ephraim Eliav, Elke Fasshauer, Timo Fleig, Loïc Halbert, Erik Donovan Hedegård, Benjamin Helmich-Paris, Miroslav Iliaš, Christoph R. Jacob, Stefan Knecht, Jon K. Laerdahl, Marta L. Vidal, Malaya K. Nayak, Małgorzata Olejniczak, Jógvan Magnus Haugaard Olsen, Markus Pernpointner, Bruno Senjean, Avijit Shee, Ayaki Sunaga, and Joost N. P. van Stralen, *J. Chem. Phys.*, 2020, 152, 204104.

<sup>88</sup> M. J. Frisch and G. W. Trucks and H. B. Schlegel and G. E. Scuseria and M. A. Robb and J. R. Cheeseman and G. Scalmani and V. Barone and G. A. Petersson and H. Nakatsuji and X. Li and M. Caricato and A. V. Marenich and J. Bloino and B. G. Janesko and R. Gomperts and B. Mennucci and H. P. Hratchian and J. V. Ortiz and A. F. Izmaylov and J. L. Sonnenberg and D. Williams-Young and F. Ding and F. Lipparini and F. Egidi and J. Goings and B. Peng and A. Petrone and T. Henderson and D. Ranasinghe and V. G. Zakrzewski and J. Gao and N. Rega and G. Zheng and W. Liang and M. Hada and M. Ehara and K. Toyota and R. Fukuda and J. Hasegawa and M. Ishida and T. Nakajima and Y. Honda and O. Kitao and H. Nakai and T. Vreven and K. Throssell and Montgomery, Jr., J. A. and J. E. Peralta and F. Ogliaro and M. J. Bearpark and J. J. Heyd and E. N. Brothers and K. N. Kudin and V. N. Staroverov and T. A. Keith and R. Kobayashi and J. Normand and K. Raghavachari and A. P. Rendell and J. C. Burant and S. S. Iyengar and J. Tomasi and M. Cossi and J. M. Millam and M. Klene and C. Adamo and R. Cammi and J. W. Ochterski and R. L. Martin and K. Morokuma and O. Farkas and J. B. Foresman and D. J. Fox, Gaussian16 Revision C.01, 2016, Gaussian Inc. Wallingford CT.

<sup>89</sup> H.-J. Werner, P. J. Knowles, F. R. Manby, J. A. Black, K. Doll, A. Heßelmann, D. Kats, A. Köhn, T. Korona, D. A. Kreplin, Q. Ma, T. F. Miller, A. Mitrushchenkov, K. A. Peterson, I. Polyak, G. Rauhut and M. Sibae, *J. Chem. Phys.*, 2020, 152, 144107.

### 16 Supporting Information bibliography

#### Notes and references

- 1 T. Shimanouchi, H. Matsuura, Y. Ogawa and I. Harada, *J. Phys. Chem. Ref. Data*, 1978, **7**, 1323-1444.
- 2 S.-W. Hu, H. Lin, X.-Y. Wang and T.-W. Chu, *J. Mol. Struct.*, 2014, **1062**, 29-34.
- 3 S. L. Garrison and J. M. Bechnel, *J. Phys. Chem. A*, 2008, **112**, 5453-5457.
- 4 A. Halkier, T. Helgaker, P. Jørgensen, W. Klopper and J. Olsen, *Chem. Phys. Lett.*, 1999, **302**, 437-446.
- 5 T. Helgaker, W. Klopper, H. Koch and J. Noga, *J. Chem. Phys.*, 1997, **106**, 9639-9646.
- 6 K. A. Peterson, D. E. Woon and T. H. Dunning, Jr., *J. Chem. Phys.*, 1994, **100**, 7410.
- 7 D. E. Woon and T. H. Dunning, Jr., *J. Chem. Phys.*, 1994, **101**, 8877.
- 8 D. Feller, K. A. Peterson and J. G. Hill, *J. Chem. Phys.*, 2011, **135**, 044102.
- 9 J. M. Martin, *Chem. Phys. Lett.*, 1996, **259**, 669-678.
- 10 V. Vasilyev, *Comput. Theor. Chem.*, 2017, **1115**, 1-3.
